1     **Effects of diffusion signal modeling and segmentation approaches on subthalamic nucleus**  
2                                    **parcellation**

3     Demetrio Milardi<sup>1,2,§,\*</sup>, Gianpaolo Antonio Basile<sup>1,§</sup>, Joshua Faskowitz<sup>3,4</sup>, Salvatore Bertino<sup>1</sup>, Angelo  
4     Quartarone<sup>1</sup>, Giuseppe Anastasi<sup>1</sup>, Alessia Bramanti<sup>2</sup>, Alberto Cacciola<sup>1,\*</sup>

5  
6     <sup>1</sup> Brain Mapping Lab, Department of Biomedical, Dental Sciences and Morphological and Functional  
7     Images, University of Messina, Messina, Italy

8     <sup>2</sup> IRCCS Centro Neurolesi “Bonino Pulejo”, Messina, Italy

9     <sup>3</sup> Program in Neuroscience, Indiana University, Bloomington, IN, USA

10    <sup>4</sup> Department of Psychological and Brain Sciences, Indiana University, 1101 E. 10th Street,  
11    Bloomington, IN, 47405, USA

12    § These authors equally contributed to the present work

13

14    \* **Correspondence**

15    Alberto Cacciola

16    Brain Mapping Lab, Department of Biomedical, Dental Sciences and Morphological and Functional  
17    Images, University of Messina, Italy

18    Phone: +39 0902217143

19    [alberto.cacciola0@gmail.com](mailto:alberto.cacciola0@gmail.com)

20

21    Demetrio Milardi

22    Brain Mapping Lab, Department of Biomedical, Dental Sciences and Morphological and Functional  
23    Images, University of Messina, Italy

24    IRCCS Centro Neurolesi “Bonino Pulejo”, Messina, Italy

25    Phone: +39 0902217143

26    [dmilardi@unime.it](mailto:dmilardi@unime.it)

27

28 **Abstract**

29 The subthalamic nucleus (STN) is commonly used as a surgical target for deep brain stimulation in  
30 movement disorders such as Parkinson's Disease. Tractography-derived connectivity-based  
31 parcellation (CBP) has been recently proposed as a suitable tool for non-invasive in vivo  
32 identification and pre-operative targeting of specific functional territories within the human STN.  
33 However, a well-established, accurate and reproducible protocol for STN parcellation is still lacking.  
34 The present work aims at testing the effects of different tractography-based approaches for the  
35 reconstruction of STN functional territories.

36 We reconstructed functional territories of the STN on the high-quality dataset of 100 unrelated  
37 healthy subjects and on the test-retest dataset of the Human Connectome Project (HCP) repository.  
38 Connectivity-based parcellation was performed with a hypothesis-driven approach according to  
39 cortico-subthalamic connectivity, after dividing cortical areas into three groups: associative, limbic  
40 and sensorimotor. Four parcellation pipelines were compared, combining different signal modeling  
41 techniques (single-fiber vs multi-fiber) and different parcellation approaches (winner takes all  
42 parcellation vs fiber density thresholding). We tested these procedures on STN regions of interest  
43 obtained from three different, commonly employed, subcortical atlases. We evaluated the pipelines  
44 both in terms of between-subject similarity, assessed on the cohort of 100 unrelated healthy subjects,  
45 and of within-subject similarity, using a second cohort of 44 subjects with available test-retest data.  
46 We found that each parcellation provides converging results in terms of location of the identified  
47 parcels, but with significative variations in size and shape. Higher between-subject similarity was  
48 found with multi-fiber signal modeling techniques combined with fiber density thresholding. All the  
49 pipelines obtained very high within-subject similarity, with tensor-based approaches outperforming  
50 multi-fiber pipelines. We suggest that a fine-tuning of tractography-based parcellation may lead to  
51 higher reproducibility and aid the development of an optimized surgical targeting protocol.

52

53 **Keywords: basal ganglia, connectivity, diffusion, MRI, neuroimaging, movement disorders,**  
54 **topography, tractography.**

55

56

## 57 **1. Introduction**

58 The subthalamic nucleus (STN) is crucially involved in the basal ganglia circuitry. Mainly composed  
59 of glutamatergic neurons (Kitai and Kita, 1987; Smith and Parent, 1988) with few GABA-ergic  
60 interneurons (Lévesque and André, 2005), the STN sends glutamatergic efferences to the striatum,  
61 the internal portion of the globus pallidus (GPi) and the two subdivisions of substantia nigra, pars  
62 compacta (SNc) and pars reticulata (SNr), while its main afference is represented by the external  
63 portion of the globus pallidus (GPe) (Hazrati and Parent, 1992; Parent and Hazrati, 1995; Parent and  
64 Parent, 2007; Smith et al., 1994, 1990). In addition, direct glutamatergic projections from the cerebral  
65 cortex have also been described (Nambu et al., 2002, 2000, 1997, 1996).

66 As for many other structures of the basal ganglia network, connections to and from STN are  
67 topographically organized. This feature allows the identification of distinct, yet integrated functional  
68 territories within all the basal ganglia structures (Alexander et al., 1990; Milardi et al., 2019). STN  
69 can be thus subdivided according to its connectivity into three functional territories: a rostromedial  
70 limbic territory, a ventrolateral associative territory and a dorsolateral motor territory (Joel and  
71 Weiner, 1997; Karachi et al., 2005; Parent and Hazrati, 1995; Shink et al., 1996). A similar  
72 topographical organization is also evident for direct cortical projections: connections arising from the  
73 primary motor cortex and supplementary motor area target the dorsal STN (Nambu et al., 1997, 1996),  
74 while projections originating from the dorsolateral prefrontal cortex and anterior cingulate cortex  
75 terminate in the ventrolateral and medial STN respectively (Haynes and Haber, 2013).

76 With the increasing use of deep brain stimulation (DBS) in the treatment of Parkinson's Disease (PD),  
77 interest in the functional anatomy of the STN has expanded. Suggested in late 90's as an alternative  
78 to ablative treatments (Benazzouz et al., 1993; Krack et al., 1998, 1997; Limousin et al., 1995), STN-  
79 DBS has a proved efficacy in treating both motor symptoms of PD and levodopa-induced dyskinesias  
80 (Deuschl et al., 2006; Rodriguez-Oroz et al., 2005; Weaver et al., 2009). More recently, DBS of STN  
81 has also been suggested for the treatment of psychiatric conditions such as treatment-resistant  
82 obsessive-compulsive disorder (OCD) (Mallet et al., 2002; Mallet et al., 2008; Haynes and Mallet,  
83 2010; Welter et al., 2011). Prior knowledge about the topographical organization of STN provides a  
84 strong background for understanding differential STN DBS effects; while positive effects of DBS in  
85 PD patients are thought to stem from targeting of the dorsal sensorimotor portion of STN (Akram et  
86 al., 2017), clinical benefits observed in OCD are likely to be related to the dorsolateral prefrontal  
87 cortex-ventrolateral STN connections (Tyagi et al., 2019).

88 Connectivity-based parcellation (CBP) based on diffusion tractography has been proposed as a useful  
89 tool for the identification of distinct functional territories within the STN (Hamani et al., 2017). CBP  
90 is an heterogeneous group of techniques that use connectivity data (e.g. from probabilistic

91 tractography) to characterize the latent topographical organization of parcels within a given region of  
92 interest (ROI) (Eickhoff et al., 2015). In the last decade, CBP has been extensively used to identify  
93 spatially segregated territories within different basal ganglia structures (Bardinet et al., 2006;  
94 Cacciola et al., 2019c; Draganski et al., 2008; Tziortzi et al., 2014) and has been even used to explore  
95 effects of implant locations in DBS surgery in experimental pilot studies (da Silva et al., 2017; E. H.  
96 Middlebrooks et al., 2018; Patriat et al., 2018). Taken together these findings suggest that CBP may  
97 provide substantial contribution to clinicians for pre-surgical planning and targeting.

98 In the past years, several works applied CBP to the study of STN functional organization in the human  
99 brain *in vivo*, confirming the topographical arrangement of STN connectivity previously described in  
100 animals (Accolla et al., 2014; Avecillas-Chasin et al., 2015; Brunenberg et al., 2012; Lambert et al.,  
101 2012; Plantinga et al., 2018). Despite the body of work demonstrating the feasibility of reconstructing  
102 STN territories using probabilistic tractography, consistent methodological differences have yet to be  
103 quantified. The lack of a well-defined connectivity-based parcellation protocol, together with the very  
104 small sample sizes, can undermine the reproducibility of results and limit their possible translation  
105 into a clinical context.

106 Based on these simple premises, the aim of the present work is to compare the effects of different  
107 STN parcellation protocols in terms of between-subjects and within-subject reproducibility. We  
108 performed hypothesis-driven CBP of the human STN on two high-quality datasets (Van Essen et al.,  
109 2013): the first cohort of 100 unrelated healthy subjects was used to assess between-subjects  
110 variability, and the second cohort of 44 healthy subjects with available test-retest data to investigate  
111 within-subject reliability. We compared two different diffusion signal modeling: a multi-fiber  
112 approach based on multi-shell multi-tissue constrained spherical deconvolution (MSMT-CSD)  
113 (Jeurissen et al., 2014), and a single-fiber diffusion tensor-based method (DTI). In addition, two  
114 different parcellation strategies were compared: a winner-takes-all segmentation, and a fiber density  
115 thresholding approach. Therefore, four distinct parcellation pipelines, combining different signal  
116 modeling techniques (single-fiber vs multi-fiber) and different parcellation approaches (winner takes  
117 all parcellation vs fiber density thresholding), were compared on three different, commonly  
118 employed, STN atlases.

119

## 120 **2. Materials and methods**

### 121 *2.1. Subjects, data acquisition and preprocessing*

122 High-quality structural and diffusion MRI data have been collected from the HCP repository. Data  
123 were acquired by the Washington University, University of Minnesota, and Oxford University (WU-  
124 Minn) HCP Consortium (Van Essen et al., 2013). The study was approved by the Washington

125 University Institutional Review Board and informed consent was obtained from all subjects. All HCP  
126 subjects were scanned using a Siemens 3T Skyra scanner (Siemens Healthcare, Erlangen, Germany)  
127 customized with a Siemens SC72 gradient coil and stronger gradient power supply with maximum  
128 gradient amplitude of 100 mT/m with the aim of improving diffusion imaging. (Van Essen et al.,  
129 2012). Two datasets have been employed for the present work: the first dataset consisted of 100  
130 unrelated healthy subjects (100UNR) (males = 46, females = 54; age range: 22–36 years), and the  
131 second dataset included 44 subjects with available test-retest MRI scans (TRT) (males = 13; females  
132 = 31; age range: 22–36 years). Notice that 5 subjects of the first group were also part of the TRT  
133 group. Structural scans included T1-weighted images, acquired with the following parameters: TE =  
134 2.14 ms, TR = 2,400 ms, and voxel size = 0.7 mm (Uğurbil et al., 2013). A single-shot two-  
135 dimensional (2D) spin-echo multiband echo planar imaging (EPI) sequence was used to acquire  
136 diffusion weighted images (DWI). All DWIs were equally distributed over three shells (b values of  
137 1,000, 2,000, and 3,000 s/mm<sup>2</sup>), with isotropic spatial resolution of 1.25 mm (Sotiropoulos et al.,  
138 2013). Data were available in a minimally preprocessed form, that includes correction of EPI  
139 susceptibility, eddy-current–induced distortions, gradient nonlinearities, subject motion, and within-  
140 subject co-registration of structural and diffusion images (Glasser et al., 2013).

141

## 142 *2.2. MRI post-processing*

143 Both structural and diffusion images were post-processed in order to perform tractography. T1-  
144 weighted structural images underwent brain extraction and cortical and subcortical segmentation  
145 using BET, FAST and FIRST tools on FSL (Patenaude et al., 2011; Smith, 2002; Smith et al., 2004).  
146 The obtained masks were visually inspected and, if needed, modified by a trained neuroanatomist.  
147 T1-weighted images were also normalized to the 1mm version of MNI152 2006 brain template using  
148 affine and nonlinear registration (FNIRT toolbox) and direct and inverse transformations were saved.  
149 A 5-tissue segmented image, needed for the implementation of MSMT-CSD, was then obtained from  
150 the native-space datasets. The 5 tissue image, together with the DWI data, was used to run multi-shell  
151 multi-tissue CSD (MSMT-CSD), an improvement of CSD signal modelling technique, in  
152 which fiber Orientation Distribution Function (fODF) is estimated directly from deconvolution of  
153 DW signal with a reference single fiber response function (Tournier et al., 2008, 2007). The MSMT-  
154 CSD modelling technique represents a variant designed to support multi-shell data and to overcome  
155 classical CSD limitations when it comes to estimate fODF in presence of tissue type heterogeneity  
156 (Jeurissen et al., 2014). For the DTI analysis, a weighted linear least squares estimation of diffusion  
157 tensors was carried out (Veraart et al., 2013). All these steps, and the following tractography, were  
158 performed using the MrTrix3 software (<http://www.mrtrix.org/>) (Tournier et al., 2012).

159

### 160 2.3. Tractography

161 A probabilistic whole-brain tractogram (WB) of 5 million streamlines was generated for each subject,  
162 both for the MSMT-CSD and for the tensor-based approach, using default tracking parameters.

163 1) For the MSMT-CSD approach, tractography was performed with the following options:  
164 algorithm = *iFOD2* (Tournier et al., 2010), step size = 0.625 mm (0.5 x voxel size), maximum  
165 angle = 45°, minimal fODF amplitude = 0.05.

166 2) For the DTI approach, tractography was performed with the following options: algorithm =  
167 *Tensor\_Prob* (Jones, 2008), step size = 0.125 mm, maximum angle = 45°, fractional  
168 anisotropy (FA) cutoff value = 0.1.

169

### 170 2.4. Regions of interest (ROIs) delineation

171 In the present work we opted for an atlas-guided identification of STN based on nonlinear registration  
172 of standard-space STN ROIs into each subject's space. To account for the variability that may be  
173 introduced by the arbitrary choice of an atlas, we tested our pipelines on three different subcortical  
174 atlases: i) a high-field structural MRI-based atlas of the basal ganglia (ATAG) (Keuken et al., 2014);  
175 ii) a template-based structural atlas (CIT168-Reinforcement Learning) (Pauli et al., 2018) and a multi-  
176 modal atlas based on combination of histology, structural and diffusion MRI (DISTAL) (Ewert et al.,  
177 2018). Atlases were all made available in MNI ICBM 2009c standard space in the LeadDBS software  
178 (Horn et al., 2019). For each atlas, left and right STN ROIs were resliced to 1 mm voxel size and  
179 transformed to the MNI152 standard space using a freely available transformation (credited to  
180 Andreas Horn, <https://dx.doi.org/10.6084/m9.figshare.3502238.v1>), then to each subject's native  
181 space using the inverse transformations obtained in the normalization step of structural preprocessing  
182 (see paragraph above).

183 Cortical ROI segmentation was performed on T1-weighted images using the FreeSurfer software  
184 (Fischl et al., 2002). Briefly, the process involves averaging of T1-weighted images, skull stripping,  
185 tessellation, topology correction and spherical inflation of the white matter surface (Fischl et al., 2002,  
186 1999b, 1999a; Ségonne et al., 2004). A modified and improved version of FreeSurfer's *recon-all*  
187 pipeline is part of the minimal preprocessing procedures provided by the HCP repository; further  
188 details can be found in Glasser et al. (2013). Parcellation of the cerebral cortex into regions with  
189 respect to gyral and sulcal structures was performed according to the Desikan-Killiany atlas (Desikan  
190 et al., 2006).

191 Like in previous studies (Cacciola et al., 2019c; Patriat et al., 2018; Plantinga et al., 2018), cortical  
192 gyral ROIs were merged into three function-related cortical targets: an associative target, consisting

193 of superior, middle and inferior frontal gyri; a limbic target including lateral orbitofrontal cortex,  
194 medial orbitofrontal cortex, frontal pole and anterior cingulate cortex; and a sensorimotor target,  
195 corresponding to precentral gyrus, postcentral gyrus and paracentral lobule.

196

### 197 2.5. Connectivity based parcellation

198 We performed CBP by applying the following pipeline, both to the MSMT-CSD and the DTI datasets:

- 199 1) From each 5-million-streamlines WB, tracts between cortical target ROIs and the STN were  
200 extracted. This step was carried out separately for each left and right STN ROI obtained with  
201 each of the three atlases, and versus each of the three cortical target ROIs (associative, limbic  
202 and sensorimotor) described above.
- 203 2) Each tractogram was converted into a track density image (TDI) (Calamante et al., 2010). In  
204 a TDI, intensity at each voxel is defined as the number of fiber tracts passing through a given  
205 grid element. Voxel size was fixed at 1 mm<sup>3</sup>, same as STN and all the other ROIs.
- 206 3) Then, each TDI was multiplied to the relative STN ROI, to retrieve connectivity density-  
207 weighted parcels on the STN volume.
- 208 4) To ensure that different connectivity would not affect the intensity values of each parcel,  
209 causing more connected parcels to have higher intensity values than less connected ones, each  
210 parcel was normalized by dividing each voxel's intensity by the mean intensity of the whole  
211 parcel.

212 From this point on, the procedure was differentiated to obtain, for each dataset, two different kinds  
213 of parcellation: the first, by following a winner-takes-all (WTA) hard segmentation approach, i.e., by  
214 assigning each STN voxel to the parcel with highest connectivity density values compared with the  
215 others; the second, without using any explicit clustering method. For the WTA parcellation scheme,  
216 normalized parcels underwent hard segmentation by running the *find\_the\_biggest* command on FSL.  
217 For the parcellation scheme without WTA parcellation, a threshold was applied to the normalized  
218 parcels, to filter out voxels with lower connectivity density, that could confound the obtained results.  
219 In line with previous work, we used an arbitrary threshold of 25%, meaning that only voxels with  
220 track density higher than 25% of the whole track-density map were preserved (Plantinga et al., 2018).

221 In summary, CBP resulted in four groups, representing diverging processing pipelines:

- 222 1) a CSD-tractography group with WTA segmentation as final step;
- 223 2) a CSD-tractography group with 25% fiber density thresholding;
- 224 3) a DTI-tractography group with WTA hard segmentation;
- 225 4) a DTI-tractography group with 25% fiber density thresholding;

226 from now on we will refer to these groups as CSD-WTA, CSD-thr25, DTI-WTA and DTI-thr25  
 227 respectively. Each of these pipelines was carried out separately on left and right STN ROIs obtained  
 228 from each of the three atlases taken into account (DISTAL, ATAG and CIT168-RL), thus resulting  
 229 in 24 possible combinations for each subject. Each pipeline subdivided the STN into three parcels  
 230 (Associative, Limbic and Sensorimotor), driving to a total of 72 parcels for each subject.  
 231 Finally, all the obtained parcels were transformed to the MNI ICBM 2009b standard template.  
 232 For visualization purposes, the parcels obtained from the 100UNR group were binarized and summed  
 233 up to obtain a maximum probability map (MPM) reflecting the average parcel at the whole sample  
 234 level. A 50% threshold was applied to each MPM, i.e., only voxels that show overlap in at least half  
 235 of the sample were taken into account. The entire processing pipeline is summarized in Figure 1.  
 236

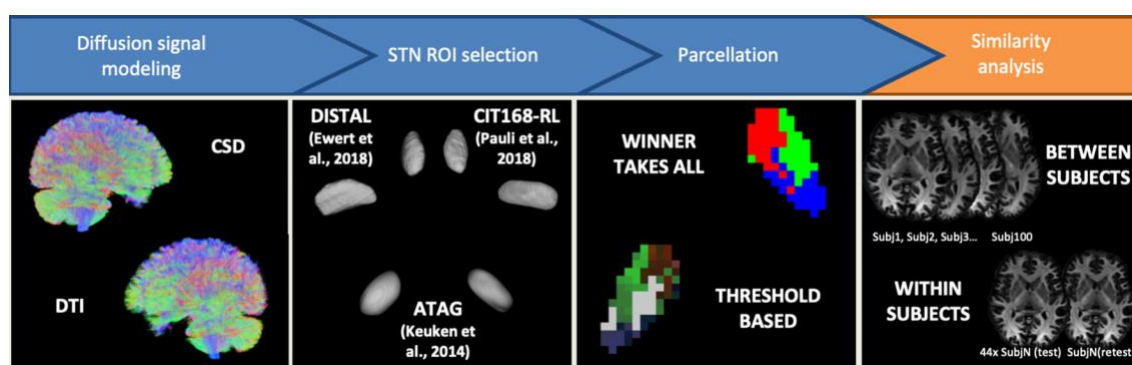

237  
 238 **Figure 1. Methodological variables in STN parcellation.** A summary of the processing pipeline, meant to highlight the  
 239 methodological variables involved in our analysis. Separate results were generated for each combination of variables, and  
 240 the outputs were tested in terms of both between- and within-subjects reliability. Full detail in text.

241  
 242 *2.6. Quantitative connectivity analysis*

243 Quantitative connectivity for each target at subject level was estimated by calculating the streamline  
 244 density index (SDI) (Cacciola et al., 2019c; Theisen et al., 2017), defined as the percentage ratio  
 245 between each parcel volume and STN ROI volume:

246 
$$SDI = \frac{v}{V_{ROI}} \times 100$$

247 where  $v$  is the parcel volume in subject space and  $V_{ROI}$  the STN ROI volume, in subject space.  
 248 Statistically significant differences were assessed for each parcel grouped by side (left or right) and  
 249 type (associative, limbic, sensorimotor). Specifically, a 3x4 repeated measures factorial ANOVA  
 250 model was applied to investigate differences in SDI related to the use of different atlases (three levels:  
 251 DISTAL, ATAG, CIT168-RL), the reconstruction pipeline employed (four levels: CSD-thr25, CSD-  
 252 WTA, DTI-thr25, DTI-WTA) and their interaction. All the statistical analysis was carried out using  
 253 SPSS Statistics (IBM SPSS Statistics for Windows, Version 25.0. Armonk, NY: IBM Corp.).



254

## 255 2.7. *Between-subject and within-subject similarity measures*

256 Reproducibility of subthalamic parcellations was evaluated both in terms of between-subject  
257 similarity, that was assessed on the 100UNR cohort, and within-subject similarity, that was measured  
258 on the TRT data. Specifically, we evaluated reproducibility by calculating similarity indices for each  
259 parcel image after registration to the standard template; the result of these similarity indices is a  
260 number ranging between 0 and 1, where a value closer to 1 indicates higher similarity and a value  
261 closer to 0 indicates high dissimilarity.

262 Between-subject similarity was evaluated by calculating the overlap-by-label (OBL), a measure of  
263 the overlap of each parcel across all datasets, and the total accumulated overlap (TAO) that measures  
264 the overall, groupwise overlap for a given parcellation pipeline. Both TAO and OBL are based on the  
265 Tanimoto coefficient, which measures the similarity between different sets:

$$266 \quad T(A, B) = \frac{N(A \cap B)}{N(A \cup B)}$$

267 where  $N$  is expressed as number of voxels (Crum et al., 2006).

268 For a group of  $m$  pairs of images, where  $m$  represents all the possible pairwise combinations between  
269 images of the same parcel, OBL is defined as:

$$270 \quad OBL = \frac{\sum_m \alpha_i N(A_i \cap B_i)}{\sum_m \alpha_i N(A_i \cup B_i)}$$

271 where  $i$  is the parcel label and  $\alpha$  is a weighting coefficient. We defined  $\alpha$  as the inverse of the mean  
272 of the absolute value of volumes for  $A$  and  $B$ , to avoid overestimation of larger parcels:

$$273 \quad \alpha = \frac{2}{|A| + |B|}$$

274 For the same group, TAO is defined as:

$$275 \quad TAO = \frac{\sum_m \sum_{i=1:n} \alpha_i N(A_i \cap B_i)}{\sum_m \sum_{i=1:n} \alpha_i N(A_i \cup B_i)}$$

276 where  $n$  is the total number of parcels obtained from a given parcellation pipeline (CSD-thr25, CSD-  
277 WTA, DTI-thr25, DTI-WTA) (da Silva et al., 2017; Traynor et al., 2010). Both OBL and TAO were  
278 calculated separately for each hemisphere and for each of the three subcortical atlases taken into  
279 account.

280 Within-subject similarity was assessed by calculating the Dice similarity coefficient (DSC) (Crum et  
281 al., 2006), a popular similarity metric that is commonly used in neuroimaging studies. Dice similarity  
282 coefficient is defined as:

$$283 \quad DSC = \frac{2N(A \cap B)}{N(A) + N(B)}$$

284 where A and B are images of the same parcel obtained for the same subject from the test and the retest  
285 scan, respectively, and N is expressed as number of voxels.

286 To investigate effects of the atlas choice and of the employed pipeline on within-subject similarity,  
287 we grouped individual DSC values for each hemisphere (left and right) and parcel type (associative,  
288 limbic and sensorimotor), and applied a 3x4 repeated measures factorial ANOVA using atlas and  
289 pipeline as within-subject factors.

290

## 291 **2.8 Spatial relations between center-of-gravity coordinates**

292 For each subject, both in the 100UNR and in the TRT groups, the center-of-gravity for each  
293 subthalamic ROI was obtained using FSL's *fslstats* command. This processed rendered an x, y, and  
294 z coordinate in standard space for each ROI of each pipeline. For the 100UNR group, we sought to  
295 characterize how these coordinates across 100 subjects varied based on parcellation strategy. We  
296 therefore obtained a 100-by-100 Euclidean distance matrix between center-of-gravity coordinates for  
297 each parcellation strategy (24 ROIs for each atlas: 72 strategies total). We then employed the Mantel  
298 test with a permutation approach (5000 permutations), to assess the statistical similarity of these  
299 distance matrices. The end result is a Mantel test conducted between each pair of pipelines, testing  
300 for the similarity of pairwise distance between strategies. For the TRT group, we sought to  
301 characterize the reliability of the center-of-gravity between test and retest scans. We therefore  
302 obtained a 44-by-44 test-retest Euclidean distance matrix between center-of-gravity coordinates of  
303 test and retest data, for each parcellation strategy (72 strategies total). Rows of this matrix documented  
304 subjects' test data, whereas columns of this matrix represented subjects' retest data. Therefore, these  
305 matrices were not symmetric. We rank transformed the rows of this matrix. For reliable data, we  
306 would expect the diagonal elements of this matrix to be near rank 1, indicating that subjects' test  
307 coordinates are least distant from their respective re-test coordinates. We performed a permutation  
308 test (5000 permutations) by randomizing the ordering of the retest coordinates, to obtain the median  
309 diagonal rank expected by chance, and compared this to the empirical median diagonal rank to obtain  
310 a p-value.

## 311 **3. Results**

### 312 ***3.1 Connectivity-based parcellation of the STN***

313 For each subject, both in the 100UNR and in the TRT group, left and right STN were subdivided into  
314 three parcels using three different pairs of STN ROI and four different pipelines. Not all the pipelines  
315 were able to reconstruct all three parcels in the totality of subjects. In particular, CSD-based pipelines  
316 (CSD-thr25 and CSD-WTA) were able to reconstruct associative, limbic and sensorimotor STN  
317 parcels in both left and right hemisphere in 100 subjects (100%) of the 100UNR group, and 44

318 subjects (100%) of the TRT group both on test and retest scans, for each of the three distinct  
319 subcortical atlases. Conversely, the reconstruction of the right hemisphere associative parcel using  
320 DTI-based pipelines (DTI-thr25; DTI-WTA) failed in 1 subject (1%) of the 100UNR group,  
321 regardless of the employed subcortical atlas. The reconstruction of the right hemisphere sensorimotor  
322 parcel failed in 2 subjects (2%) of the 100UNR group for each of the three subcortical atlases, and in  
323 1 subject (1%) only for the ATAG atlas. In the 100UNR group, limbic parcel was not successfully  
324 reconstructed in the left hemisphere in 17 subjects (17%) regardless of the employed subcortical atlas,  
325 in 2 subjects (2%) using ATAG and CIT168-RL atlases and in 21 subjects (21%) using ATAG atlas  
326 only; in the right hemisphere, reconstruction of the limbic parcel failed in 34 subjects regardless of  
327 the employed subcortical atlas, in 1 subject using DISTAL and ATAG atlases and in 11 subjects  
328 (11%) using ATAG atlas only. In the TRT group, the limbic parcel was not reconstructed for the left  
329 STN in 22 test datasets (50%) and 23 retest datasets (50.5%) regardless of the employed subcortical  
330 atlas, and in 6 test (13.6%) and 6 retest (13.6%) datasets using the ATAG atlas only; for the right  
331 STN, the reconstruction of the limbic parcel failed in 36 test (81.8%) and 37 retest (84%) datasets  
332 using each of the three employed subcortical atlases, and in 3 test (6.8%) and 4 retest (9.1%) using  
333 ATAG atlas only. Due to the high failure rate, the limbic parcel was excluded from all the statistical  
334 analyses. In all the described cases, failure was related to the tract selection step of the pipeline (see  
335 paragraph 2.5, step 1) as no streamlines connecting STN ROIs and target regions were extracted from  
336 the 5-million-streamlines WB. Related frequencies of successfully reconstructed parcels for each  
337 atlas and group are reported in Supplementary file 1.

338 For visualization purposes, the average population maps obtained from the 100UNR group are  
339 displayed in Figure 2. It is worth to note that, despite the evident differences in size and shape of STN  
340 ROIs across different subcortical atlases, STN parcels share a similar spatial organization: the  
341 associative parcel is located in the ventrolateral portion of STN, the limbic parcel in the ventromedial  
342 STN and sensorimotor parcel in the dorsolateral STN.

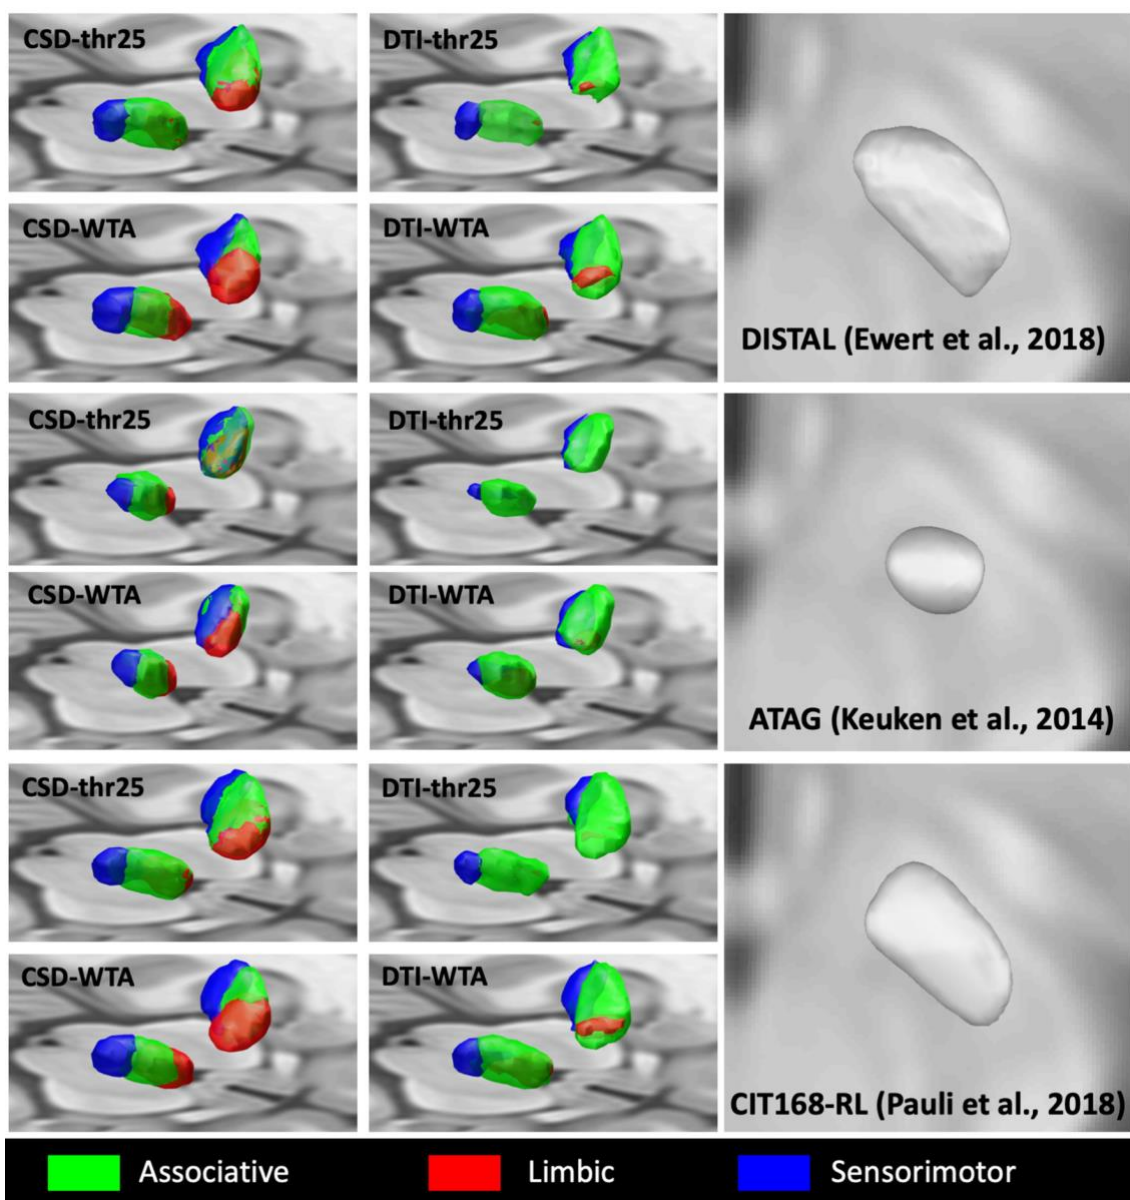

**Figure 2. Group-level STN maps using different parcellation pipelines.** 3D renderings of maximum probability maps retrieved after parcellation of the STN using different pipelines. Maximum probability maps are obtained after transformation of each subject map to template space; maps have been binarized and summed up across all subjects and a 50% population threshold was set. Hence, MPM volumes are representative of the number of voxels overlapping in at least 50% of the sample.

A similar spatial organization can be also observed by comparing the outputs of different parcellation pipelines within STN ROIs obtained from the same subcortical atlas (supplementary file 2). Thresholded MPMs of STN parcels show marked differences in volumes across different atlases and pipelines (Table 1).

| Atlas                                           | Pipeline  | L-Associative | L-Limbic | L-Sensorimotor | R-Associative | R-Limbic | R-Sensorimotor |
|-------------------------------------------------|-----------|---------------|----------|----------------|---------------|----------|----------------|
| <b>DISTAL</b><br><i>(Ewert et al., 2018)</i>    | CSD-WTA   | 222           | 201.375  | 209.5          | 227.625       | 215.25   | 206.875        |
|                                                 | CSD-thr25 | 371           | 199.375  | 232.5          | 340.125       | 165.125  | 189.125        |
|                                                 | DTI-WTA   | 328.75        | 39.875   | 143            | 328           | 93.875   | 124.625        |
|                                                 | DTI-thr25 | 200.75        | 10.375   | 88.625         | 209.5         | 2.375    | 67             |
| <b>ATAG</b><br><i>(Keuken et al., 2014)</i>     | CSD-WTA   | 166.75        | 145      | 172.5          | 167.5         | 143      | 163.5          |
|                                                 | CSD-thr25 | 231           | 115.375  | 194.375        | 219.375       | 103.25   | 146.875        |
|                                                 | DTI-WTA   | 190.375       | 33.375   | 113.375        | 209.5         | 75.375   | 66             |
|                                                 | DTI-thr25 | 122.75        | /        | 61             | 130.125       | /        | 30             |
| <b>CIT168-RL</b><br><i>(Pauli et al., 2018)</i> | CSD-WTA   | 224.875       | 206.25   | 199.875        | 234.625       | 214.5    | 187            |
|                                                 | CSD-thr25 | 364.875       | 193.875  | 208.5          | 341.5         | 167.125  | 168.5          |
|                                                 | DTI-WTA   | 339.5         | 49.875   | 146.375        | 350.5         | 98.875   | 120.25         |
|                                                 | DTI-thr25 | 229           | 7.875    | 90             | 228.625       | 2.375    | 65             |

357 **Table 1. Volumes of maximum probability maps of STN (mm<sup>3</sup>).** Maximum probability maps are obtained after  
358 transformation of each subject map to template space; maps have been binarized and summed up across all subjects  
359 and a 50% population threshold was set. Hence, MPM volumes are representative of the number of voxels  
360 overlapping in at least 50% of the sample.

361

362 As reported in the “Materials and methods” section (paragraph 2.6), such volumes reflect the number  
363 of voxels overlapping in at least half of the sample after normalization to standard space. This number  
364 is generally higher for parcels obtained through CSD-based pipelines, in particular for the limbic  
365 parcels, that show very reduced or even absent voxel overlap in DTI-based pipelines, probably due  
366 to the high number of subjects in which such parcels were not reconstructed by using DTI.

367

### 368 **3.2 Quantitative connectivity analysis**

369 To investigate how the choice of STN ROIs from different subcortical atlases and the use of different  
370 pipelines for parcellation influence the quantitative connectivity estimates, we conducted a 3x4  
371 repeated measures ANOVA grouping parcels by hemisphere (left and right) and type (associative,  
372 sensorimotor).

373 For both left and right associative and sensorimotor parcels, Mauchly’s test of sphericity indicated a  
374 violation of sphericity for atlas, pipeline and their interaction factor. Degrees of freedom and p-values  
375 were adjusted using the Greenhouse-Geisser correction.

376 We found a significant effect of atlas choice on SDI values for both associative (left:  
377  $F(1.10,108.96)=4388.37$ ,  $p<0.001$ ,  $\eta_p^2=0.98$ ; right:  $F(1.10,108.42)$ ,  $p<0.001$ ,  $\eta_p^2=0.97$ ), and

378 sensorimotor parcels (left:  $F(1.12,110.69)=1588.24$ ,  $p<0.001$ ,  $\eta_p^2=0.94$ ; right:  
379  $F(1.18,116.90)=1420.69$ ,  $p<0.001$ ,  $\eta_p^2=0.94$ ).

380 A significant effect of pipeline selection was also found for all the analyzed parcels (left associative:  
381  $F(2.30,227.17)=494.11$ ,  $p<0.001$ ,  $\eta_p^2=0.83$ ; right associative:  $F(2.60,253.31)=399.23$ ,  $p<0.001$ ,  
382  $\eta_p^2=0.80$ ; left sensorimotor:  $F(1.96,194.00)=361.911$ ,  $\eta_p^2=0.76$ ; right sensorimotor:  
383  $F(1.71,169.57)=528.22$ ,  $p<0.001$ ,  $\eta_p^2=0.84$ ).

384 Finally, a significant interaction effect of atlas choice and pipeline selection was found for all parcels:  
385 left associative ( $F(2.68,265.25)=276.57$ ,  $p<0.001$ ,  $\eta_p^2=0.74$ ), right associative  
386 ( $F(3.2,316.28)=284.34$ ,  $p<0.001$ ,  $\eta_p^2=0.74$ ), left sensorimotor ( $F(2.33,230.93)=135.18$ ,  $p<0.001$ ,  
387  $\eta_p^2=0.58$ ) and right sensorimotor ( $F(2.56,253.87)=211.74$ ,  $p<0.001$ ,  $\eta_p^2=0.68$ ). Distributions of SDI  
388 values across different parcels, grouped by atlas and pipeline, are plotted in Figure 3.

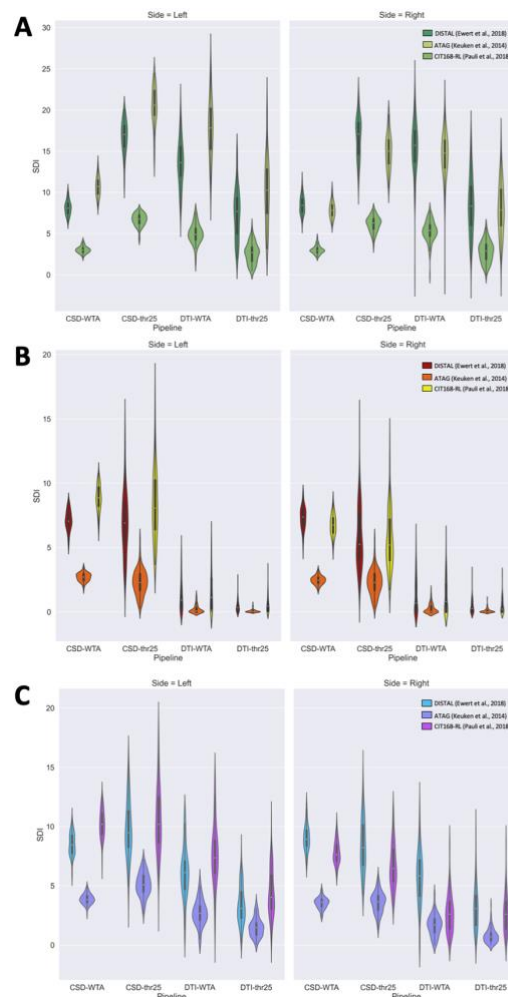

389  
390 **Figure 3. Subject-level volume differences across parcellation pipelines.** Streamline Density Index (SDI) values for  
391 each parcellation pipeline are reported in violin plots. A) associative parcel; B) limbic parcel; C) sensorimotor parcel.  
392  
393  
394

### 395 **3.3 Between-subjects and within-subject similarity**

396 Between-subjects similarity was evaluated for each parcellation pipeline grouped by hemisphere and  
397 atlas using TAO, whose values are indicative of the groupwise accumulated overlap for all the parcels  
398 obtained using each pipeline. Independently of the atlas, we found a similar pattern such that higher  
399 TAO values were obtained using CSD-WTA (DISTAL atlas: left 0.65, right 0.66; ATAG atlas: left  
400 0.67, right 0.67; CIT168-RL atlas: left 0.67; right 0.67) or CSD-thr25 (DISTAL atlas: left 0.67, right  
401 0.65; ATAG atlas: left 0.68, right 0.66; CIT168-RL atlas: left 0.67, right 0.65), in comparison to the  
402 lower values obtained using DTI-WTA (DISTAL atlas: left 0.45, right 0.43; ATAG atlas: left 0.42;  
403 right 0.39; CIT168-RL atlas: left 0.46, right 0.43) or DTI-thr25 pipelines (DISTAL atlas: left 0.39,  
404 right 0.35; ATAG atlas: left 0.40, right 0.32; CIT168-RL atlas: left 0.40, right 0.36).

405 To investigate the relative weight of each parcel in driving the accumulated similarity values observed  
406 by TAO, we also evaluated similarity at the parcel-wise level by calculating OBL. The obtained  
407 values are plotted separately for each atlas in Figure 4A. Generally speaking, results confirm the trend  
408 observed in TAO values and related to CSD-based versus DTI-based parcellation, with the former  
409 performing better than the latter in most of the cases. Among different parcels, in most of the observed  
410 cases, the associative parcels scored the highest OBL values, followed by sensorimotor parcels,  
411 although few exceptions were observed, in particular using ATAG atlas. In all cases, limbic parcels  
412 obtained the lower OBL values. In addition, more marked differences were observed between WTA-  
413 based and threshold-based methods; in particular, for CSD-based pipelines, threshold-based  
414 approaches resulted in higher, but less uniform OBL values (range: 0.56-0.78), while WTA-based  
415 approaches obtained generally lower, but more uniform values (range: 0.63-0.71); conversely, for  
416 DTI-based pipelines, WTA-based pipelines always obtained higher OBL values (range: 0.10-0.73) in  
417 comparison to threshold-based pipelines (range: 0.10-0.55).

418 To evaluate and compare within-subject similarity across different atlases and pipelines, we  
419 calculated average DSC for each individual of the TRT datasets (Figure 4B). Then, we grouped DSC  
420 values by hemisphere (left and right) and parcel type (associative and sensorimotor) and conducted a  
421 3x4 repeated measures ANOVA to investigate effects of atlas and pipeline choice.

422

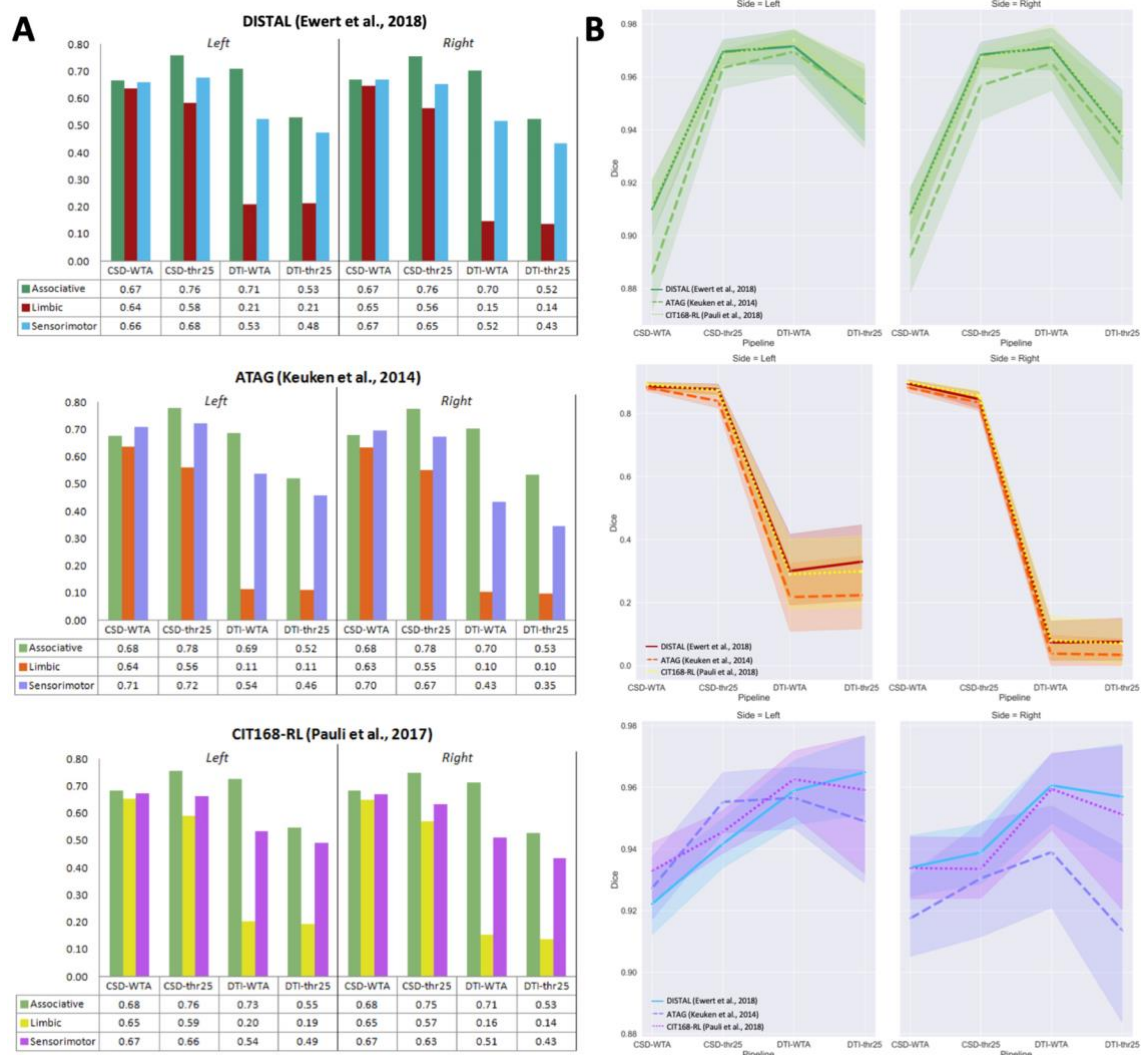

423

424 **Figure 4. Between-subjects and within-subjects similarity measures.** A) Overlap-by-label (OBL) values plotted for  
 425 each parcel types. Values are reported in tables. B) Average Dice similarity coefficients (DSC) estimated on the test-retest  
 426 (TRT) dataset, between parcels obtained with the same pipeline on test and retest data.

427

428 Since Mauchly's test of sphericity indicated a violation of sphericity for atlas, pipeline and their  
 429 interaction factor for all parcels, degrees of freedom and p-values were adjusted using the  
 430 Greenhouse-Geisser correction.

431 For left associative parcel, we found a significant effect of atlas ( $F(1.29,55.37)=9.742$ ,  $p=0.001$ ,  
 432  $\eta_p^2=0.19$ ), pipeline ( $F(2.14,91.97)=79.44$ ,  $p<0.001$ ,  $\eta_p^2=0.65$ ) and their interaction factor  
 433 ( $F(3.82,164.37)=8.84$ ,  $p<0.001$ ,  $\eta_p^2=0.17$ ). Conversely, for right associative parcel a significant effect  
 434 on DSC was found both for atlas ( $F(1.25,53.83)=7.05$ ,  $p=0.007$ ,  $\eta_p^2=0.14$ ) and pipeline choice  
 435 ( $F(1.97,84.84)=64.92$ ,  $p<0.001$ ,  $\eta_p^2=0.60$ ), but no significant interaction effects were found  
 436 ( $p=0.35$ ). A significant effect of atlas selection on DSC values was not found ( $p=0.56$ ); conversely,  
 437 a significant effect of pipeline choice ( $F(1.54,66.071)=64.92$ ,  $p=0.001$ ,  $\eta_p^2=0.18$ ) and a significant  
 438 interaction effect of atlas and pipeline choice ( $F(3.40,146.03)=64.92$ ,  $p<0.019$ ,  $\eta_p^2=0.070$ ) were



439 found. Finally, for right sensorimotor parcel, a significant effect was found for atlas  
440 ( $F(1.23,53.04)=14.57$ ,  $p<0.001$ ,  $\eta_p^2=0.25$ ) and pipeline ( $F(1.98,89.18)=4.02$ ,  $p=0.022$ ,  $\eta_p^2=0.85$ ) but  
441 no significant interaction effect was found ( $p=0.056$ ).

442

### 443 **3.4 Variation between center-of-gravity coordinates between parcellation approaches**

444 When assessing the variation between center-of-gravity coordinates between parcellation approaches,  
445 we observed significant similarities (corrected for false-discovery rate at  $\alpha=0.01$ ) between approaches  
446 (Figure 5A). These significant similarities indicate pairs of methods that produce highly similar  
447 distance matrices across 100 subjects' data. Many of these significant similarities involve the same  
448 ROIs with differing thresholding (thr25 vs. WTA), and are commonly found between reconstruction  
449 methods (CSD vs DTI). This suggests that the pairwise variation in center-of-gravity coordinates  
450 could be ROI specific and less affected by parcellation strategy. These significant similarities are  
451 more commonly observed for the CIT168-RL and DISTAL atlases, than for the ATAG atlas. The x,  
452 y, and z coordinates for each approach, sorted by ROI, are visualized with boxplots in Figure 5B.  
453 These boxplots show how the coordinates are generally within a similar range, with relatively few  
454 outliers (with outliers determined by being 1.5 times outside of the interquartile range).

455 Using the TRT dataset and a permutation testing approach, we were able to test the reliability of the  
456 center-of-gravity coordinates for each method across scanning sessions. Of the 72 methods tested,  
457 64 displayed significantly lower median distance ranking than as expected by chance ( $\alpha<0.01$ ).

458 Only 8 parcels were not found to be significantly reliable by this approach; all of them were limbic  
459 parcels and obtained with DTI signal modeling.

460

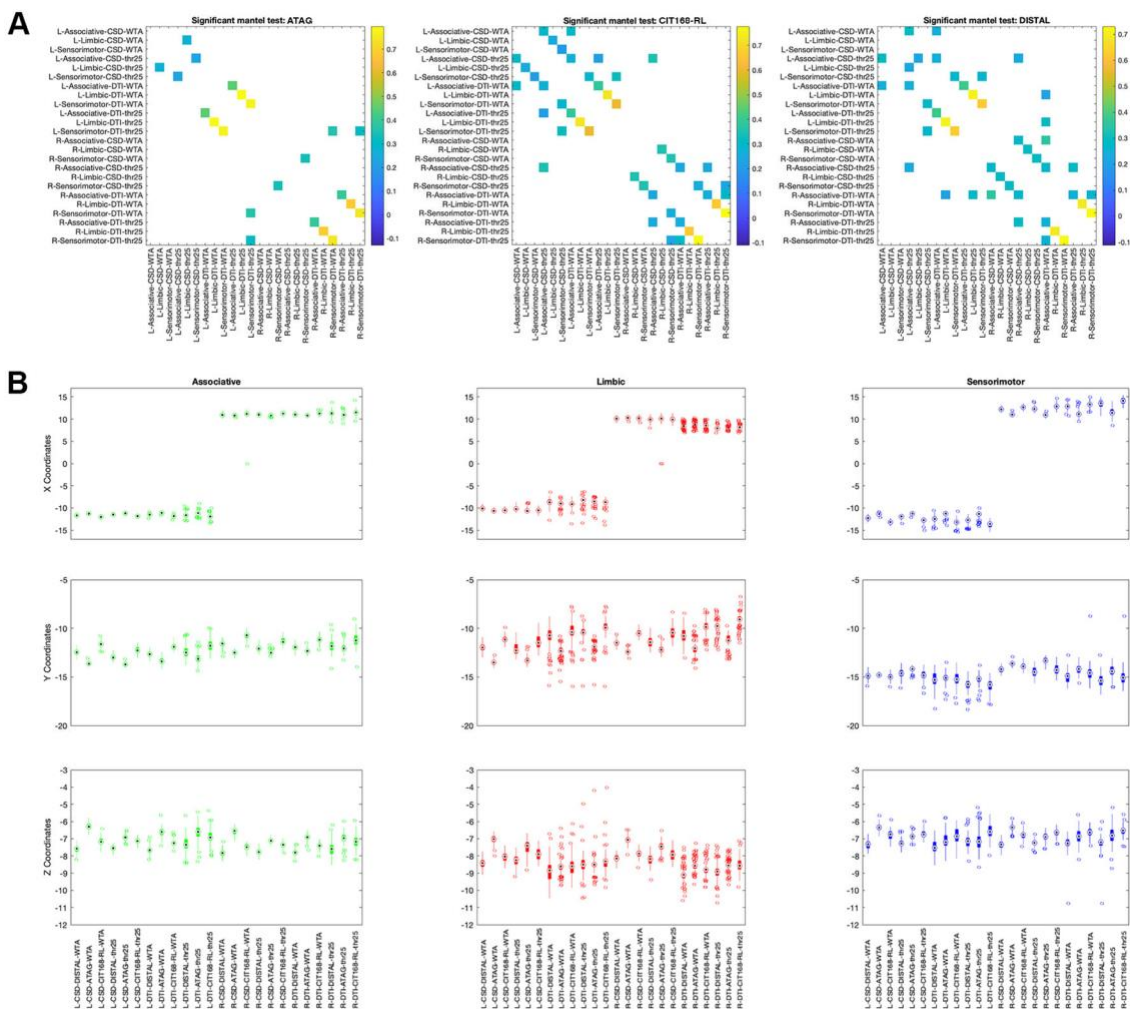

461

462 **Figure 5.** A) The results of Mantel tests to comparing the Euclidean distances between subjects, for each parcellation  
 463 approach; only significant correlations are shown ( $\alpha < 0.01$ ) B) Boxplots visualizing the x, y, and z coordinates for each  
 464 approach (central marking: median; bottom and top edges of box: 25<sup>th</sup> and 75<sup>th</sup> percentiles; outliers indicated as dots).

465

#### 466 4. Discussion

467 The present work, by performing STN connectivity-based parcellation, compares four different  
 468 parcellation methods: one using CSD tractography, and the other using classical single-fiber DTI  
 469 tractography, both with and without a winner-takes-all parcellation approach. Our results show that  
 470 all the four different parcellation approaches identified structurally segregated parcels in the human  
 471 STN.

472 Our results are in line with the growing body of literature based on non-human primates anatomical  
 473 and behavioral evidence (Hamani et al., 2017; Karachi et al., 2005, 2009), by showing a well-  
 474 characterized topographical organization of connectivity in the human STN, with the ventromedial  
 475 STN prominently connected to limbic cortical areas, dorsomedial STN with associative cortical  
 476 regions, and dorsolateral STN with sensorimotor cortices. This organization has also been  
 477 investigated in different human studies using advanced MRI and neuroimaging techniques (Table 2).

478

| <i>Authors, year</i>                 | <i>Subjects</i>     | <i>Field Strength</i> | <i>Number of parcels</i>                                             | <i>Signal modeling</i>                       | <i>Tractography</i>          | <i>STN identification</i>          | <i>Clustering method</i>                                  |
|--------------------------------------|---------------------|-----------------------|----------------------------------------------------------------------|----------------------------------------------|------------------------------|------------------------------------|-----------------------------------------------------------|
| <i>Lambert et al., 2012</i>          | 12 healthy subjects | 3T                    | 3 (motor, limbic, associative)                                       | Multi-fiber model (bedpostX)                 | Probabilistic                | Manual delineation on R2* images   | Hierarchical clustering                                   |
| <i>Brunenberg et al., 2012</i>       | 8 healthy subjects  | 3T                    | 3 (Primary motor cortex, supplementary motor area, precentral gyrus) | Q-ball imaging                               | Probabilistic                | Talairach (stereotaxic)            | No explicit clustering method                             |
| <i>Accolla et al., 2014</i>          | 13 healthy subjects | 3T                    | 3 (motor, limbic, associative)                                       | Multi-fiber model (bedpostX)                 | Probabilistic                | Morel atlas (histological)         | Winner-takes-all                                          |
| <i>Avecillas-Chasin et al., 2015</i> | 6 patients (PD)     | 3T                    | 1 (motor)                                                            | Single-fiber DTI (StealthViz)                | Deterministic                | Manual delineation on FLAIR images | No explicit clustering method                             |
| <i>Petersen et al., 2017</i>         | 5 patients (PD)     | 3T                    | 1 (motor)                                                            | Single fiber DTI; Multi-fiber model (MrTrix) | Deterministic; Probabilistic | Manual delineation on T2 images    | No explicit clustering method                             |
| <i>Plantinga et al., 2018</i>        | 17 patients (PD)    | 7T                    | 4 (motor, limbic, associative, other)                                | Multi-fiber model (bedpostX)                 | Probabilistic                | Manual delineation on T2 images    | 25% connectivity threshold; no explicit clustering method |
| <i>Ewert et al., 2018</i>            | 32 healthy subjects | 3T                    | 3 (motor, limbic, associative)                                       | Diffusion spectrum imaging                   | Global tractography          | Template-based                     | Winner-takes-all                                          |

479 **Table 2. Connectivity-based parcellation of the STN: an overview.** Synopsis of the previously existing published  
 480 works which have attempted the reconstruction of STN functional territories using tractography. For each study the  
 481 following details are listed: the first author, year of publication, number and type of human subjects, field strength of the  
 482 MRI scanner used, the number of parcels obtained, the signal modeling and tractography technique used, the method used  
 483 for STN identification and the clustering protocol.

484

485 Earlier reports identified a posterior-anterior gradient in STN-motor cortical connectivity, where  
 486 voxels in the posterolateral STN show higher structural and functional connectivity to motor areas  
 487 and voxels in the antero-medial STN show higher functional connectivity to limbic areas (Brunenberg  
 488 et al., 2012). Lambert and colleagues used a partially automated clustering method on probabilistic  
 489 tractography data from 12 healthy subjects and subsequently mapped the connectivity of each parcel  
 490 to basal ganglia and cortex, revealing a tripartite subdivision of STN that broadly supports findings  
 491 in animals (Lambert et al., 2012). Similar results were obtained by Accolla and colleagues by  
 492 mapping cortical connectivity of the STN using an hypothesis-driven approach; the authors also found

493 differences in regional covariance of some brain tissue properties (myelination and iron content)  
494 between limbic-associative STN and motor STN, by using quantitative structural MRI (Accolla et al.,  
495 2014). Plantinga et al. combined 7T structural MRI and probabilistic tractography to identify the  
496 motor domain of STN on 17 idiopathic PD patients before undergoing DBS treatment. The STN was  
497 subdivided into four compartments (associative, limbic, sensorimotor and the remaining cortex) and  
498 average volumes of each parcels in relation to the whole STN volume are reported (Plantinga et al.,  
499 2018). Finally, a tractography-based parcellation based on a group normative connectome of 32  
500 healthy subjects obtained using diffusion spectrum imaging (DSI) paired with a global tractography  
501 algorithm (Horn and Blankenburg, 2016) was implemented on a template-based manual delineation  
502 of STN and included in a popular standard-space DBS atlas: parcellation was conducted using a WTA  
503 approach based on the tripartite model of STN connectivity (associative, limbic and sensorimotor  
504 parcels) (Ewert et al., 2018). In agreement with their findings, we described a similar overall  
505 topographical parcel organization at the group level, and similar parcel volumes at subject level, with  
506 larger volumes for sensorimotor and associative parcels and smaller limbic parcels.

507 Moreover, we demonstrated that this general topographic organization is preserved regardless of the  
508 subcortical atlas used for STN segmentation and of the parcellation pipeline employed; this finding  
509 is further corroborated not only by visual inspection but also from the correlation found between  
510 center of gravities of parcels obtained from different pipelines, which suggest that the pairwise  
511 variation in center-of-gravity coordinates may be only minimally affected by different parcellation  
512 strategies. On the other hand, we found that sizes and volumes of each parcel can significantly vary  
513 across different methods. In particular, our results suggest that the volume ratio of each parcel is  
514 strongly influenced not only by atlas selection (i.e. parcels obtained with a certain atlas tend to have  
515 different volumes compared to parcels obtained with another atlas) and pipeline selection (i.e. parcels  
516 obtained with a certain pipeline also are systematically different from parcels obtained with another  
517 pipeline), but that a highly significant interaction effect may be also found, i.e. parcel volumes  
518 obtained with each combination of atlas and parcel tend to behave in a different way. Caution should  
519 then be used in interpreting parcel volumes obtained using tractography-derived parcellation as  
520 biologically meaningful estimates of the volume of each STN functional territory.

521 To the best of our knowledge, this is the first work that uses DTI signal modeling combined with  
522 probabilistic tractography to reconstruct the entire topographical organization of human STN.  
523 Compared to CSD and other complex, multi-fiber modeling techniques, DTI is faster and requires  
524 less computing power, making it more suitable for clinical context (Avecillas-Chasin et al., 2015;  
525 Berman, 2009; Essayed et al., 2017). A previous study implemented DTI and deterministic  
526 tractography-based parcellation in a neuronavigation system to parcellate STN in 6 patients

527 undergoing DBS for PD, but was aimed at identifying only the motor compartment (Avecillas-Chasin  
528 et al., 2015). Another pilot study on 5 PD patients compared the reconstruction of motor projections  
529 of cortico-STN pathway using CSD and DTI, and found substantial differences in position and shape  
530 between these two techniques; they also report higher variability in COG of reconstructed parcels for  
531 DTI compared to CSD, suggesting that DTI may provide less reproducible results (Petersen et al.,  
532 2017). In line with their findings, parcels obtained with DTI show appreciable differences when  
533 compared with those obtained with CSD. The most salient differences were found for the limbic  
534 parcel, as these parcels were not reconstructed in a large number of subjects, independently of the  
535 atlas employed for STN segmentation. These differences may be due to well-known DTI limitations,  
536 in particular when dealing with complex fiber configurations such as fanning and crossing fibers, or  
537 regions of high intra-voxel inhomogeneity in fiber orientation (O'Donnell and Westin, 2011) that  
538 may lead to underestimation of streamlines. On the other hand, a fair agreement can be observed  
539 between sensorimotor and associative parcels, that were reconstructed successfully in almost the  
540 totality of subjects even using DTI-based methods.

541 In our reliability analysis of subthalamic parcellations, we evaluated both between-subjects and  
542 within-subject similarity, for those subjects with available TRT data. Between-subjects similarity was  
543 assessed using two overlap metrics that slightly differ from each other in their meaning and  
544 interpretation: TAO may be interpreted as a global estimate of the reproducibility of the whole  
545 pipeline, whereas OBL evaluates the similarity of single parcels obtained with the same procedure.  
546 While the choice of different atlases for STN parcellation had a likely negligible effect on TAO  
547 values, the impact of signal modeling is evident from our results, where marked differences in TAO  
548 values can be observed between CSD-based pipelines and DTI-based pipelines.

549 However, we suggest that the poor reconstruction of limbic parcels with DTI signal modeling may  
550 account for these differences in TAO, as can be deduced from the very low OBL values obtained with  
551 DTI-based pipelines for these parcels (see Figure 4A). On the other hand, differences in OBL are  
552 lower for associative and sensorimotor parcels, where OBL values obtained with CSD-based  
553 pipelines are similar to those obtained with DTI-based pipelines. For the associative parcel, in  
554 particular, DTI/WTA pipelines yield systematically higher OBL values when compared to  
555 CSD/WTA, regardless of the atlas taken into account. This is, however, the only exception in which  
556 DTI-based parcellation seems to outperform a CSD-based method. The general trend suggests that  
557 DTI-based parcellation pipelines may provide less reproducible results when compared to CSD-based  
558 pipelines, both globally (TAO values) and for each single parcel (OBL values).

559 It is worthwhile to note, however, that associative and sensorimotor parcels yielded higher OBL  
560 values in all the pipelines, including DTI-based pipelines, suggesting that these parcels may be

561 successfully identified with fair reliability also by using simpler signal modeling algorithms such as  
562 DTI. This proposition is strengthened by the results of within-subjects similarity, that was evaluated  
563 in the TRT dataset by using DSC, a very commonly used similarity measure for neuroimaging. Even  
564 if all the parcels obtained very high similarity between test and retest scans ( $DSC > 0.88$ ) with the  
565 only exception of DTI-based limbic parcels (that were probably biased by the high number of  
566 reconstruction failures, higher than 50% for most of the atlases and sides), statistically significant  
567 differences emerged. Although the effective significance of differences driven by atlas choice or by  
568 atlas and pipeline interactions could be questioned, due to their inconsistency between parcel types  
569 and the relatively small effect sizes, a significant effect of pipeline selection, with substantially high  
570 effect sizes, emerged for all parcels. Interestingly, DTI-based pipelines apparently outperformed  
571 CSD-based pipelines in terms of test-retest reliability, showing similar or even higher average DSC  
572 values.

573 This was particularly evident when comparing protocols including a WTA hard segmentation as  
574 conclusive step and protocols without WTA hard segmentation. Hard segmentation exclusively  
575 assigns each voxel in the target ROI to the parcel displaying higher connectivity values (Behrens et  
576 al., 2003). Although widely used in literature (Cacciola et al., 2019a, 2019b; da Silva et al.,  
577 2017b; Middlebrooks et al., 2018; Middlebrooks et al., 2018), the use of a WTA approach may  
578 introduce a bias, by showing only the most connected voxels, and then imposing a stricter parcellation  
579 in respect to the anatomical reality. In particular, it has been suggested that STN may be composed  
580 of partially overlapping functional territories rather than well-delineated subdivisions (Alkemade et  
581 al., 2015; Lambert et al., 2015; Plantinga et al., 2018): the choice of a WTA-free parcellation protocol  
582 would then better fit this anatomical scenario. However, the choice of using no explicit parcellation  
583 methods may require the selection of a connectivity threshold to filter out the voxels with lower  
584 connectivity profiles (Domin and Lotze, 2019; Johansen-Berg et al., 2005; Tziortzi et al., 2014),  
585 introducing an additional source of arbitrariness within the parcellation pipeline. In our parcellation  
586 pipeline we used the connectivity threshold of 25%, in line with previous works (Plantinga et al.,  
587 2018). Differences in between-subjects similarity indices due to different parcellation approach  
588 (WTA, no WTA) are less marked than those deriving from different signal modeling (CSD, DTI); in  
589 other words, it seems that the choice of parcellation approach has a smaller influence on between-  
590 subjects similarity, compared to the choice of diffusion signal modeling. In contrast with this  
591 observation, more marked differences were found in within-subject similarity; in particular, CSD-  
592 WTA pipeline resulted in lower average DSC values when compared both to CSD-thr25 or DTI-  
593 based pipelines. Our results suggest that, when using higher-level diffusion signal modeling  
594 algorithms, WTA parcellation may provide less reproducible results when compared to other

595 parcellation methods. In line with this hypothesis, a recent work demonstrated that, using WTA  
596 parcellation, most voxels remain part of the same parcel even after extreme corruption of the  
597 underlying DWI dataset (random shuffling of diffusion parameters between voxels). The authors  
598 suggested that the use of a connectivity threshold may be a possible solution, by excluding from  
599 parcellation results the voxels with lower connectivity values, considering that local noise generally  
600 decreases the number of streamlines (Clayden et al., 2019). On the other hand, our results show that,  
601 when using simpler signal modeling methods, such as DTI, similarity indices are higher when using  
602 WTA segmentation. This apparently counterintuitive result may be interpreted considering that DTI-  
603 based pipelines, in general, retrieved lower OBL and TAO values, possibly meaning higher variability  
604 of tractographic reconstruction. We hypothesize that the stricter constraints imposed by WTA  
605 parcellation may in part mitigate this variability, resulting in higher reproducibility.

606 Some limitations must be taken into account in the interpretation of our findings. The present work  
607 evaluates the reproducibility of different parcellation pipelines by assessing similarity between the  
608 resulting connectivity-based parcels across different subjects in a sample; in other words, our outcome  
609 measure is not able to assess whether between-subject, similarity is an effect of simple anatomical  
610 variability of structures of interest, rather than reproducibility of the parcellation pipeline. However,  
611 by using the same sample for the entire analysis, we can reasonably assume as constant between-  
612 subjects anatomical variability and interpret differences in similarity as mainly due to the effects of  
613 parcellation pipeline.

614 Another important conceptual issue worth mentioning is that higher reproducibility of a given  
615 parcellation pipeline does not necessarily imply higher biological accuracy of the obtained parcels.  
616 In the present work we apply an atlas-based method for identification of STN in healthy subjects.  
617 When dealing with atlas-based segmentation of the STN, it should be kept in mind that, to date, no  
618 gold-standard method is available and that different atlases of the STN provide substantial differences  
619 in position and size of this small region of interest (Ewert et al., 2018). To account for differences  
620 that may derive from arbitrary atlas selection, we tested our pipelines in three recent, state-of-art  
621 subcortical atlases including the STN (Ewert et al., 2018; Keuken et al., 2014; Pauli et al., 2018), and  
622 we found that the choice of atlas may have a specific impact not only on parcel volumes, but also on  
623 some similarity estimates. In addition, atlases based on healthy young subjects may not take into  
624 account differences in STN size introduced by age or underlying pathology (Patriat et al., 2020). The  
625 aim of the present study was to test the effects of methodological variables in the processing pipelines  
626 on STN parcellation results, rather than propose a gold-standard, biologically meaningful parcellation  
627 of this structure; therefore, on small clinical cohorts such as those typically used in STN-DBS studies,  
628 it is generally advised to identify STN manually on T2-weighted scans. However, manual

629 identification of STN in larger cohorts is time-consuming and the precise identification of its ventral  
630 border could be challenging even on high field strength (7T) T2-weighted scans (Bot et al., 2019).  
631 Furthermore, every parcellation pipeline is inevitably affected by all the well-known intrinsic  
632 limitations of tractography, such as the inability to determine the precise origin/termination of  
633 connections at the synaptic level, difficulty in disentangling intra-voxel fiber heterogeneity and  
634 susceptibility to possible misestimates of connectivity due to modeling errors (false  
635 positives/negatives) (Cacciola et al., 2019a, 2017; Calamuneri et al., 2018; Chung et al., 2011;  
636 Jbabdi and Johansen-Berg, 2011; Parker et al., 2013; Rizzo et al., 2018).

637 Herein, we only tested hypothesis-driven parcellation protocols, which, in comparison with data-  
638 driven parcellation methods, are more subject to selection bias, as the number of target regions is  
639 selected *a priori* and is not based on intrinsic properties of the given dataset (Eickhoff et al., 2015).  
640 We believe that a hypothesis driven approach fits better to the current situation since the employed  
641 connectivity-based subdivision of the STN is grounded on a solid anatomical background in animals  
642 (Hamani et al., 2017) and has been replicated in humans (Ewert et al., 2018; Plantinga et al., 2018);  
643 moreover, hypothesis-driven parcellation provides more easily interpretable results and would be  
644 more suitable in a clinical context, not requiring specific computational expertise to be carried out.  
645 Finally, we applied a step-wise track generation approach, based on local parameters; this approach  
646 is not as robust to noise, imaging artefacts and partial volume effects as global tractography (Jbabdi  
647 et al., 2007; Reisert et al., 2011). Despite this, we have opted for traditional, local step-wise tracking  
648 since it is faster and more commonly available than global tractography, and we acknowledge that  
649 the global approach may have beneficial effects on the overall reproducibility of the parcellation  
650 pipelines.

651 We believe that our results may have clinical relevance for the development of a robust,  
652 reproducible protocol for parcellation of the STN, which may be useful for pre-operative targeting  
653 in DBS. Indeed, therapeutic stimulation of STN is often affected by well-known behavioral,  
654 cognitive and affective side effects, such as impulse dyscontrol (Frank et al., 2007; Hälbig et al.,  
655 2009), irritability and agitation (Merello et al., 2009), psychosis (Kimmel et al., 2013), cognitive  
656 and executive functioning deficits (Jahanshahi et al., 2000; Funkiewiez et al., 2004; Rothlind et al.,  
657 2015), depression and suicidal ideation (Temel et al., 2006; Voon et al., 2008; Aviles-Olmos et al.,  
658 2014). Erroneous targeting of neighboring structures and/or of different STN functional territories  
659 is a proposed anatomical substrate for such complications (Greenhouse et al., 2011; Hamani et al.,  
660 2017; Temel et al., 2005; Tremblay et al., 2015) In addition, it may be reasonably hypothesized that  
661 stimulating the sensorimotor portion of STN may provide better clinical outcomes. A study used  
662 probabilistic tractography in PD patients after DBS surgery to retrieve connectivity fingerprints



663 from Volume of Tissue Activated (VTA) models of active electrodes and demonstrated that cortico-  
664 STN connectivity with motor and premotor cortical areas was predictive of clinical improvement  
665 in tremor, rigidity or bradykinesia (Akram et al., 2017). Moreover, in addition to the well-  
666 consolidated framework of sensorimotor STN stimulation in PD, DBS of the anteromedial,  
667 limbic/associative STN has been proposed as a useful target for treating refractory OCD (Haynes  
668 and Mallet, 2010; Polosan et al., 2019). Noteworthy, an emerging line of evidence suggests that  
669 beneficial effects of STN-DBS in OCD may be mediated by structural connectivity to ventrolateral  
670 prefrontal cortex and dorsal orbitofrontal cortex (Li et al., 2020; Tyagi et al., 2019). Connectivity-  
671 based identification of the associative portion of the STN could then be helpful for optimization of  
672 presurgical targeting for OCD. Taken together, these results suggest that an accurate and  
673 reproducible individualized targeting of STN sub-regions may represent an important clinical  
674 innovation and may lead to better clinical outcomes and fewer undesired side effects after surgery.  
675 Our results suggest that, when available, higher-level signal modeling algorithms such as CSD may  
676 be recommended since it provides more reproducible results; on the other hand, hard segmentation  
677 approaches should be avoided since they may lead to misestimation of volumes of the target regions  
678 and lower reproducibility of results. Generally speaking, DTI signal modeling provides less  
679 reproducible parcellation, but it may supply however acceptable reproducibility for targeting of the  
680 sensorimotor or associative STN territories, in particular when coupled with a WTA parcellation.  
681 Finally, it is worth noting that our results are derived from very high-quality MRI acquisitions from  
682 the HCP repository (Van Essen et al., 2012) and further evidence is needed to extend these  
683 conclusions to MRI acquisitions commonly available in clinical practice.

684

## 685 **Conclusions**

686 The present work tested four different CBP pipelines for reconstruction of STN functional territories.  
687 We showed that, regardless of the chosen pipeline, each parcellation provides similar results in terms  
688 of location of the identified parcels, but with significant variations in size and shape. Our results also  
689 suggest that a more reproducible parcellation may be achieved by using advanced diffusion signal  
690 modeling algorithms, such as CSD, and by avoiding hard segmentation as final step of the pipeline  
691 (no WTA approach). Further studies are warranted to translate our results into a clinical setting and  
692 to demonstrate which technique may lead to more biologically accurate results.

693

694 **Acknowledgements:** Data were provided by the Human Connectome Project, WU-Minn Consortium  
695 (Principal Investigators: David Van Essen and Kamil Ugurbil; 1U54MH091657), funded by the 16  
696 NIH institutes and centers that support the NIH Blueprint for Neuroscience Research; and by the

697 McDonnell Center for Systems Neuroscience at Washington University.

698

699 **Declaration of interest:** The authors have nothing to declare

700

701 **Author statement:** DM: Conceptualization, Investigation, Supervision, Writing – original draft;  
702 Writing – review & editing; GAB: Conceptualization, Investigation, Writing – original draft; Writing  
703 – review & editing, Visualization; JF: Formal analysis, Writing – review & editing; SB:  
704 Conceptualization, Investigation, Writing – original draft; Writing – review & editing, Visualization;  
705 AQ: Resources, Data curation, Writing – review & editing; GA: Resources, Data curation, Writing –  
706 review & editing; AB: Resources, Data curation; AC: Conceptualization, Investigation, Project  
707 administration, Supervision, Writing – original draft; Writing – review & editing.

708

709 **Data availability:** One dataset of 100 unrelated healthy subjects **and one test–retest dataset, which**  
710 **is a subset of the 1,200 individual MRIs**, were used to support the findings of this study. Data were  
711 provided by the Human Connectome Project, WU-Minn Consortium (Principal Investigators: David  
712 Van Essen and Kamil Ugurbil; 1U54MH091657) and are publicly available at  
713 <https://www.humanconnectome.org/study/hcp-young-adult/document/1200-subjects-data-release>.

714

715 **Funding information:** This research did not receive any specific grant from funding agencies in the  
716 public, commercial, or not-for-profit sectors

717

718 **Bibliography**

- 719 Accolla, E.A., Dukart, J., Helms, G., Weiskopf, N., Kherif, F., Lutti, A., Chowdhury, R., Hetzer, S.,  
720 Haynes, J.D., Kühn, A.A., Draganski, B., 2014. Brain tissue properties differentiate between  
721 motor and limbic basal ganglia circuits. *Hum. Brain Mapp.* <https://doi.org/10.1002/hbm.22533>
- 722 Akram, H., Georgiev, D., Mahlknecht, P., Hyam, J., Foltynie, T., Limousin, P., Jahanshahi, M.,  
723 Hariz, M., Zrinzo, L., Ashburner, J., Behrens, T., Sotiropoulos, S.N., Jbabdi, S., De Vita, E.,  
724 2017. Subthalamic deep brain stimulation sweet spots and hyperdirect cortical connectivity in  
725 Parkinson's disease. *Neuroimage.* <https://doi.org/10.1016/j.neuroimage.2017.07.012>
- 726 Alexander, G.E., Crutcher, M.D., DeLong, M.R., 1990. Basal ganglia-thalamocortical circuits:  
727 Parallel substrates for motor, oculomotor, &quot;prefrontal&quot; and &quot;limbic&quot;  
728 functions. *Prog. Brain Res. Elsevier Sci. Publ. B.V. (Biomedical Div.*
- 729 Alkemade, A., Schnitzler, A., Forstmann, B.U., 2015. Topographic organization of the human and  
730 non-human primate subthalamic nucleus. *Brain Struct. Funct.* [https://doi.org/10.1007/s00429-](https://doi.org/10.1007/s00429-015-1047-2)  
731 [015-1047-2](https://doi.org/10.1007/s00429-015-1047-2)
- 732 Avecillas-Chasin, J.M., Alonso-Frech, F., Parras, O., del Prado, N., Barcia, J.A., 2015. Assessment  
733 of a method to determine deep brain stimulation targets using deterministic tractography in a  
734 navigation system. *Neurosurg. Rev.* <https://doi.org/10.1007/s10143-015-0643-1>
- 735 Bardin, E., Ugurbil, K., Benali, H., Dormont, D., Yelnik, J., Lehericy, S., Jbabdi, S., 2006.  
736 Combined DTI fiber tracking and histological 3D atlas mapping of sensorimotor, associative  
737 and limbic cortico – striatal circuits, in: *Proceedings 14th Scientific Meeting, International*  
738 *Society for Magnetic Resonance in Medicine.*
- 739 Behrens, T.E.J., Johansen-Berg, H., Woolrich, M.W., Smith, S.M., Wheeler-Kingshott, C.A.M.,  
740 Boulby, P.A., Barker, G.J., Sillery, E.L., Sheehan, K., Ciccarelli, O., Thompson, A.J., Brady,  
741 J.M., Matthews, P.M., 2003. Non-invasive mapping of connections between human thalamus  
742 and cortex using diffusion imaging. *Nat. Neurosci.* <https://doi.org/10.1038/nn1075>
- 743 Benazzouz, A., Gross, C., Féger, J., Boraud, T., Bioulac, B., 1993. Reversal of Rigidity and  
744 Improvement in Motor Performance by Subthalamic High-frequency Stimulation in MPTP-  
745 treated Monkeys. *Eur. J. Neurosci.* <https://doi.org/10.1111/j.1460-9568.1993.tb00505.x>
- 746 Berman, J., 2009. Diffusion MR Tractography As a Tool for Surgical Planning. *Magn. Reson.*  
747 *Imaging Clin. N. Am.* <https://doi.org/10.1016/j.mric.2009.02.002>
- 748 Bot, M., Verhagen, O., Caan, M., Potters, W. V., Dilai, Y., Odekerken, V.J.J., Dijk, J.M., De Bie,  
749 R.M.A., Schuurman, P.R., Van Den Munckhof, P., 2019. Defining the Dorsal STN Border  
750 Using 7.0-T MRI: A Comparison to Microelectrode Recordings and Lower Field Strength  
751 MRI. *Stereotact. Funct. Neurosurg.* <https://doi.org/10.1159/000500109>

- 752 Brunenberg, E.J.L., Moeskops, P., Backes, W.H., Pollo, C., Cammoun, L., Vilanova, A., Janssen,  
753 M.L.F., Visser-Vandewalle, V.E.R.M., ter Haar Romeny, B.M., Thiran, J.P., Platel, B., 2012.  
754 Structural and resting state functional connectivity of the subthalamic nucleus: Identification of  
755 motor stn parts and the hyperdirect pathway. PLoS One.  
756 <https://doi.org/10.1371/journal.pone.0039061>
- 757 Cacciola, A., Bertino, S., Basile, G.A., Di Mauro, D., Calamuneri, A., Chillemi, G., Duca, A.,  
758 Bruschetta, D., Flace, P., Favaloro, A., Calabrò, R.S., Anastasi, G., Milardi, D., 2019a.  
759 Mapping the structural connectivity between the periaqueductal gray and the cerebellum in  
760 humans. *Brain Struct. Funct.* <https://doi.org/10.1007/s00429-019-01893-x>
- 761 Cacciola, A., Calabrò, R.S., Costa, A., Naro, A., Milardi, D., Bruschetta, D., 2017. Enlarged  
762 Virchow-Robin spaces in a young man: a constrained spherical deconvolution tractography  
763 study. *Acta Biomed.* 88, 337–351.
- 764 Cacciola, A., Milardi, D., Basile, G.A., Bertino, S., Calamuneri, A., Chillemi, G., Paladina, G.,  
765 Impellizzeri, F., Trimarchi, F., Anastasi, G., Bramanti, A., Rizzo, G., 2019b. The cortico-rubral  
766 and cerebello-rubral pathways are topographically organized within the human red nucleus.  
767 *Sci. Rep.* 9, 1–12. <https://doi.org/10.1038/s41598-019-48164-7>
- 768 Cacciola, A., Milardi, D., Bertino, S., Basile, G.A., Calamuneri, A., Chillemi, G., Rizzo, G.,  
769 Anastasi, G., Quartarone, A., 2019c. Structural connectivity-based topography of the human  
770 globus pallidus: Implications for therapeutic targeting in movement disorders. *Mov. Disord.*  
771 34, 987–996. <https://doi.org/10.1002/mds.27712>
- 772 Calamante, F., Tournier, J.D., Jackson, G.D., Connelly, A., 2010. Track-density imaging (TDI):  
773 Super-resolution white matter imaging using whole-brain track-density mapping. *Neuroimage.*  
774 <https://doi.org/10.1016/j.neuroimage.2010.07.024>
- 775 Calamuneri, A., Arrigo, A., Mormina, E., Milardi, D., Cacciola, A., Chillemi, G., Marino, S., Gaeta,  
776 M., Quartarone, A., 2018. White Matter Tissue Quantification at Low b-Values Within  
777 Constrained Spherical Deconvolution Framework. *Front. Neurol.* 9, 716.  
778 <https://doi.org/10.3389/fneur.2018.00716>
- 779 Chung, H.W., Chou, M.C., Chen, C.Y., 2011. Principles and limitations of computational  
780 algorithms in clinical diffusion tensor MR tractography. *Am. J. Neuroradiol.* 32, 3–13.  
781 <https://doi.org/10.3174/ajnr.A2041>
- 782 Clayden, J.D., Thomas, D.L., Kraskov, A., 2019. Tractography-based parcellation does not provide  
783 strong evidence of anatomical organisation within the thalamus. *Neuroimage* 199, 418–426.  
784 <https://doi.org/10.1016/j.neuroimage.2019.06.019>
- 785 Crum, W.R., Camara, O., Hill, D.L.G., 2006. Generalized overlap measures for evaluation and

- 786 validation in medical image analysis. *IEEE Trans. Med. Imaging*.  
787 <https://doi.org/10.1109/TMI.2006.880587>
- 788 da Silva, N.M., Ahmadi, S.A., Tafula, S.N., Cunha, J.P.S., Bötzel, K., Vollmar, C., Rozanski, V.E.,  
789 2017. A diffusion-based connectivity map of the GPi for optimised stereotactic targeting in  
790 DBS. *Neuroimage*. <https://doi.org/10.1016/j.neuroimage.2016.06.018>
- 791 Desikan, R.S., Ségonne, F., Fischl, B., Quinn, B.T., Dickerson, B.C., Blacker, D., Buckner, R.L.,  
792 Dale, A.M., Maguire, R.P., Hyman, B.T., Albert, M.S., Killiany, R.J., 2006. An automated  
793 labeling system for subdividing the human cerebral cortex on MRI scans into gyral based  
794 regions of interest. *Neuroimage* 31, 968–980.  
795 <https://doi.org/10.1016/j.neuroimage.2006.01.021>
- 796 Deuschl, G., Schade-Brittinger, C., Krack, P., Volkmann, J., Schäfer, H., Bötzel, K., Daniels, C.,  
797 Deutschländer, A., Dillmann, U., Eisner, W., Gruber, D., Hamel, W., Herzog, J., Hilker, R.,  
798 Klebe, S., Kloß, M., Koy, J., Krause, M., Kupsch, A., Lorenz, D., Lorenzl, S., Mehdorn, H.M.,  
799 Moringlane, J.R., Oertel, W., Pinsker, M.O., Reichmann, H., Reuß, A., Schneider, G.-H.,  
800 Schnitzler, A., Steude, U., Sturm, V., Timmermann, L., Tronnier, V., Trottenberg, T.,  
801 Wojtecki, L., Wolf, E., Poewe, W., Voges, J., 2006. A Randomized Trial of Deep-Brain  
802 Stimulation for Parkinson’s Disease. *N. Engl. J. Med.* <https://doi.org/10.1056/nejmoa060281>
- 803 Domin, M., Lotze, M., 2019. Parcellation of motor cortex-associated regions in the human corpus  
804 callosum on the basis of Human Connectome Project data. *Brain Struct. Funct.*  
805 <https://doi.org/10.1007/s00429-019-01849-1>
- 806 Draganski, B., Kherif, F., Klöppel, S., Cook, P.A., Alexander, D.C., Parker, G.J.M., Deichmann, R.,  
807 Ashburner, J., Frackowiak, R.S.J., 2008. Evidence for segregated and integrative connectivity  
808 patterns in the human Basal Ganglia. *J. Neurosci.* [https://doi.org/10.1523/JNEUROSCI.1486-](https://doi.org/10.1523/JNEUROSCI.1486-08.2008)  
809 [08.2008](https://doi.org/10.1523/JNEUROSCI.1486-08.2008)
- 810 Eickhoff, S.B., Thirion, B., Varoquaux, G., Bzdok, D., 2015. Connectivity-based parcellation:  
811 Critique and implications. *Hum. Brain Mapp.* <https://doi.org/10.1002/hbm.22933>
- 812 Essayed, W.I., Zhang, F., Unadkat, P., Cosgrove, G.R., Golby, A.J., O’Donnell, L.J., 2017. White  
813 matter tractography for neurosurgical planning: A topography-based review of the current state  
814 of the art. *NeuroImage Clin.* <https://doi.org/10.1016/j.nicl.2017.06.011>
- 815 Ewert, S., Pletting, P., Li, N., Chakravarty, M.M., Collins, D.L., Herrington, T.M., Kühn, A.A.,  
816 Horn, A., 2018. Toward defining deep brain stimulation targets in MNI space: A subcortical  
817 atlas based on multimodal MRI, histology and structural connectivity. *Neuroimage*.  
818 <https://doi.org/10.1016/j.neuroimage.2017.05.015>
- 819 Fischl, B., Salat, D.H., Busa, E., Albert, M., Dieterich, M., Haselgrove, C., Van Der Kouwe, A.,

- 820 Killiany, R., Kennedy, D., Klaveness, S., Montillo, A., Makris, N., Rosen, B., Dale, A.M.,  
821 2002. Whole brain segmentation: Automated labeling of neuroanatomical structures in the  
822 human brain. *Neuron*. [https://doi.org/10.1016/S0896-6273\(02\)00569-X](https://doi.org/10.1016/S0896-6273(02)00569-X)
- 823 Fischl, B., Sereno, M.I., Dale, A.M., 1999a. Cortical surface-based analysis: II. Inflation, flattening,  
824 and a surface-based coordinate system. *Neuroimage*. <https://doi.org/10.1006/nimg.1998.0396>
- 825 Fischl, B., Sereno, M.I., Tootell, R.B.H., Dale, A.M., 1999b. High-resolution intersubject averaging  
826 and a coordinate system for the cortical surface. *Hum. Brain Mapp.*  
827 [https://doi.org/10.1002/\(SICI\)1097-0193\(1999\)8:4<272::AID-HBM10>3.0.CO;2-4](https://doi.org/10.1002/(SICI)1097-0193(1999)8:4<272::AID-HBM10>3.0.CO;2-4)
- 828 Glasser, M.F., Sotiropoulos, S.N., Wilson, J.A., Coalson, T.S., Fischl, B., Andersson, J.L., Xu, J.,  
829 Jbabdi, S., Webster, M., Polimeni, J.R., Van Essen, D.C., Jenkinson, M., 2013. The minimal  
830 preprocessing pipelines for the Human Connectome Project. *Neuroimage* 80, 105–124.  
831 <https://doi.org/10.1016/j.neuroimage.2013.04.127>
- 832 Greenhouse, I., Gould, S., Houser, M., Hicks, G., Gross, J., Aron, A.R., 2011. Stimulation at dorsal  
833 and ventral electrode contacts targeted at the subthalamic nucleus has different effects on  
834 motor and emotion functions in Parkinson's disease. *Neuropsychologia*.  
835 <https://doi.org/10.1016/j.neuropsychologia.2010.12.030>
- 836 Hamani, C., Florence, G., Heinsen, H., Plantinga, B.R., Temel, Y., Uludag, K., Alho, E., Teixeira,  
837 M.J., Amaro, E., Fonoff, E.T., 2017. Subthalamic Nucleus Deep Brain Stimulation: Basic  
838 Concepts and Novel Perspectives. *Eneuro* 4, ENEURO.0140-17.2017.  
839 <https://doi.org/10.1523/ENEURO.0140-17.2017>
- 840 Haynes, W.I.A., Haber, S.N., 2013. The Organization of Prefrontal-Subthalamic Inputs in Primates  
841 Provides an Anatomical Substrate for Both Functional Specificity and Integration:  
842 Implications for Basal Ganglia Models and Deep Brain Stimulation. *J. Neurosci.*  
843 <https://doi.org/10.1523/jneurosci.4674-12.2013>
- 844 Haynes, W.I.A., Mallet, L., 2010. High-frequency stimulation of deep brain structures in obsessive-  
845 compulsive disorder: The search for a valid circuit. *Eur. J. Neurosci.*  
846 <https://doi.org/10.1111/j.1460-9568.2010.07418.x>
- 847 Hazrati, L.N., Parent, A., 1992. Convergence of subthalamic and striatal efferents at pallidal level in  
848 primates: an anterograde double-labeling study with biocytin and PHA-L. *Brain Res.*  
849 [https://doi.org/10.1016/0006-8993\(92\)90648-S](https://doi.org/10.1016/0006-8993(92)90648-S)
- 850 Horn, A., Blankenburg, F., 2016. Toward a standardized structural-functional group connectome in  
851 MNI space. *Neuroimage*. <https://doi.org/10.1016/j.neuroimage.2015.08.048>
- 852 Horn, A., Li, N., Dembek, T.A., Kappel, A., Boulay, C., Ewert, S., Tietze, A., Husch, A., Perera, T.,  
853 Neumann, W.J., Reisert, M., Si, H., Oostenveld, R., Rorden, C., Yeh, F.C., Fang, Q.,

- 854 Herrington, T.M., Vorwerk, J., Kühn, A.A., 2019. Lead-DBS v2: Towards a comprehensive  
855 pipeline for deep brain stimulation imaging. *Neuroimage*.  
856 <https://doi.org/10.1016/j.neuroimage.2018.08.068>
- 857 Jbabdi, S., Johansen-Berg, H., 2011. Tractography: Where Do We Go from Here? *Brain Connect.*  
858 <https://doi.org/10.1089/brain.2011.0033>
- 859 Jbabdi, S., Woolrich, M.W., Andersson, J.L.R., Behrens, T.E.J., 2007. A Bayesian framework for  
860 global tractography. *Neuroimage* 37, 116–129.  
861 <https://doi.org/10.1016/j.neuroimage.2007.04.039>
- 862 Jeurissen, B., Tournier, J.D., Dhollander, T., Connelly, A., Sijbers, J., 2014. Multi-tissue  
863 constrained spherical deconvolution for improved analysis of multi-shell diffusion MRI data.  
864 *Neuroimage*. <https://doi.org/10.1016/j.neuroimage.2014.07.061>
- 865 Joel, D., Weiner, I., 1997. The connections of the primate subthalamic nucleus: Indirect pathways  
866 and the open-interconnected scheme of basal ganglia-thalamocortical circuitry. *Brain Res.*  
867 *Rev.* [https://doi.org/10.1016/S0165-0173\(96\)00018-5](https://doi.org/10.1016/S0165-0173(96)00018-5)
- 868 Johansen-Berg, H., Behrens, T.E.J., Sillery, E., Ciccarelli, O., Thompson, A.J., Smith, S.M.,  
869 Matthews, P.M., 2005. Functional–Anatomical Validation and Individual Variation of  
870 Diffusion Tractography-based Segmentation of the Human Thalamus. *Cereb. Cortex* 15, 31–  
871 39. <https://doi.org/10.1093/cercor/bhh105>
- 872 Jones, D.K., 2008. Tractography GoneWild: Probabilistic Fibre Tracking Using the Wild Bootstrap  
873 With Diffusion Tensor MRI. *IEEE Trans. Med. Imaging*.  
874 <https://doi.org/10.1109/TMI.2008.922191>
- 875 Karachi, C., Grabli, D., Baup, N., Mounayar, S., Tandé, D., François, C., Hirsch, E.C., 2009.  
876 Dysfunction of the subthalamic nucleus induces behavioral and movement disorders in  
877 monkeys. *Mov. Disord.* <https://doi.org/10.1002/mds.22547>
- 878 Karachi, C., Yelnik, J., Tandé, D., Tremblay, L., Hirsch, E.C., François, C., 2005. The  
879 pallidosubthalamic projection: An anatomical substrate for nonmotor functions of the  
880 subthalamic nucleus in primates. *Mov. Disord.* <https://doi.org/10.1002/mds.20302>
- 881 Keuken, M.C., Bazin, P.L., Crown, L., Hootsmans, J., Laufer, A., Müller-Axt, C., Sier, R., van der  
882 Putten, E.J., Schäfer, A., Turner, R., Forstmann, B.U., 2014. Quantifying inter-individual  
883 anatomical variability in the subcortex using 7T structural MRI. *Neuroimage*.  
884 <https://doi.org/10.1016/j.neuroimage.2014.03.032>
- 885 Kitai, S.T., Kita, H., 1987. Anatomy and Physiology of the Subthalamic Nucleus: A Driving Force  
886 of the Basal Ganglia. [https://doi.org/10.1007/978-1-4684-5347-8\\_25](https://doi.org/10.1007/978-1-4684-5347-8_25)
- 887 Krack, P., Benazzouz, A., Pollak, P., Limousin, P., Piallat, B., Hoffmann, D., Xie, J., Benabid,

- 888 A.L., 1998. Treatment of tremor in Parkinson's disease by subthalamic nucleus stimulation.  
889 Mov. Disord. <https://doi.org/10.1002/mds.870130608>
- 890 Krack, P., Pollak, P., Limousin, P., Benazzouz, A., Benabid, A.L., 1997. Stimulation of subthalamic  
891 nucleus alleviates tremor in Parkinson's disease. Lancet. <https://doi.org/10.1016/S0140->  
892 [6736\(97\)24049-3](https://doi.org/10.1016/S0140-6736(97)24049-3)
- 893 Lambert, C., Zrinzo, L., Nagy, Z., Lutti, A., Hariz, M., Foltynie, T., Draganski, B., Ashburner, J.,  
894 Frackowiak, R., 2015. Do we need to revise the tripartite subdivision hypothesis of the human  
895 subthalamic nucleus (STN)? Response to Alkemade and Forstmann. Neuroimage.  
896 <https://doi.org/10.1016/j.neuroimage.2015.01.038>
- 897 Lambert, C., Zrinzo, L., Nagy, Z., Lutti, A., Hariz, M., Foltynie, T., Draganski, B., Ashburner, J.,  
898 Frackowiak, R., 2012. Confirmation of functional zones within the human subthalamic  
899 nucleus: Patterns of connectivity and sub-parcellation using diffusion weighted imaging.  
900 Neuroimage. <https://doi.org/10.1016/j.neuroimage.2011.11.082>
- 901 Lévesque, J.C., André, P., 2005. GABAergic interneurons in human subthalamic nucleus. Mov.  
902 Disord. <https://doi.org/10.1002/mds.20374>
- 903 Li, N., Baldermann, J.C., Kibleur, A., Treu, S., Akram, H., Elias, G.J.B., Boutet, A., Lozano, A.M.,  
904 Al-Fatly, B., Strange, B., Barcia, J.A., Zrinzo, L., Joyce, E., Chabardes, S., Visser-Vandewalle,  
905 V., Polosan, M., Kuhn, J., Kühn, A.A., Horn, A., 2020. A unified connectomic target for deep  
906 brain stimulation in obsessive-compulsive disorder. Nat. Commun.  
907 <https://doi.org/10.1038/s41467-020-16734-3>
- 908 Limousin, P., Pollak, P., Benazzouz, A., Hoffmann, D., Le Bas, J.F., Perret, J.E., Benabid, A.L.,  
909 Broussolle, E., 1995. Effect on parkinsonian signs and symptoms of bilateral subthalamic  
910 nucleus stimulation. Lancet. [https://doi.org/10.1016/S0140-6736\(95\)90062-4](https://doi.org/10.1016/S0140-6736(95)90062-4)
- 911 Mallet L, Polosan M, Jaafari N, Baup N, Welter ML, Fontaine D, du Montcel ST, Yelnik J, Chéreau  
912 I, Arbus C, Raoul S, Aouizerate B, Damier P, Chabardès S, Czernecki V, Ardouin C, Krebs  
913 MO, Bardinet E, Chaynes P, Burbaud P, Cornu P, Derost P, Bougerol T, Ba, P.A.S.S.G., 2008.  
914 Subthalamic nucleus stimulation in severe obsessive-compulsive disorder. N. Engl. J. Med.
- 915 Mallet, L., Mesnage, V., Houeto, J.L., Pelissolo, A., Yelnik, J., Behar, C., Gargiulo, M., Welter,  
916 M.L., Bonnet, A.M., Pillon, B., Cornu, P., Dormont, D., Pidoux, B., Allilaire, J.F., Agid, Y.,  
917 2002. Compulsions, Parkinson's disease, and stimulation. Lancet.  
918 [https://doi.org/10.1016/S0140-6736\(02\)11339-0](https://doi.org/10.1016/S0140-6736(02)11339-0)
- 919 Middlebrooks, Erik H., Tuna, I.S., Almeida, L., Grewal, S.S., Wong, J., Heckman, M.G., Lesser,  
920 E.R., Bredel, M., Foote, K.D., Okun, M.S., Holanda, V.M., 2018. Structural connectivity–  
921 based segmentation of the thalamus and prediction of tremor improvement following thalamic



- 922 deep brain stimulation of the ventral intermediate nucleus. *NeuroImage Clin.* 20, 1266–1273.  
923 <https://doi.org/10.1016/j.nicl.2018.10.009>
- 924 Middlebrooks, E. H., Tuna, I.S., Grewal, S.S., Almeida, L., Heckman, M.G., Lesser, E.R., Foote,  
925 K.D., Okun, M.S., Holanda, V.M., 2018. Segmentation of the globus pallidus internus using  
926 probabilistic diffusion tractography for deep brain stimulation targeting in Parkinson disease.  
927 *Am. J. Neuroradiol.* <https://doi.org/10.3174/ajnr.A5641>
- 928 Milardi, D., Quartarone, A., Bramanti, A., Anastasi, G., Bertino, S., Basile, G.A., Buonasera, P.,  
929 Pilone, G., Celeste, G., Rizzo, G., Bruschetta, D., Cacciola, A., 2019. The Cortico-Basal  
930 Ganglia-Cerebellar Network: Past, Present and Future Perspectives. *Front. Syst. Neurosci.* 13,  
931 61. <https://doi.org/10.3389/fnsys.2019.00061>
- 932 Nambu, A., Takada, M., Inase, M., Tokuno, H., 1996. Dual somatotopical representations in the  
933 primate subthalamic nucleus: evidence for ordered but reversed body-map transformations  
934 from the primary motor cortex and the supplementary motor area. *J. Neurosci.*
- 935 Nambu, A., Tokuno, H., Hamada, I., Kita, H., Imanishi, M., Akazawa, T., Ikeuchi, Y., Hasegawa,  
936 N., 2000. Excitatory cortical inputs to pallidal neurons via the subthalamic nucleus in the  
937 monkey. *J. Neurophysiol.* <https://doi.org/10.1152/jn.2000.84.1.289>
- 938 Nambu, A., Tokuno, H., Inase, M., Takada, M., 1997. Corticosubthalamic input zones from  
939 forelimb representations of the dorsal and ventral divisions of the premotor cortex in the  
940 macaque monkey: Comparison with the input zones from the primary motor cortex and the  
941 supplementary motor area. *Neurosci. Lett.* [https://doi.org/10.1016/S0304-3940\(97\)00877-X](https://doi.org/10.1016/S0304-3940(97)00877-X)
- 942 Nambu, A., Tokuno, H., Takada, M., 2002. Functional significance of the cortico-subthalamo-  
943 pallidal “hyperdirect” pathway. *Neurosci. Res.* [https://doi.org/10.1016/S0168-0102\(02\)00027-](https://doi.org/10.1016/S0168-0102(02)00027-5)  
944 5
- 945 O’Donnell, L.J., Westin, C.F., 2011. An introduction to diffusion tensor image analysis. *Neurosurg.*  
946 *Clin. N. Am.* <https://doi.org/10.1016/j.nec.2010.12.004>
- 947 Parent, A., Hazrati, L.N., 1995. Functional anatomy of the basal ganglia. II. The place of  
948 subthalamic nucleus and external pallidum in basal ganglia circuitry. *Brain Res. Rev.*  
949 [https://doi.org/10.1016/0165-0173\(94\)00008-D](https://doi.org/10.1016/0165-0173(94)00008-D)
- 950 Parent, M., Parent, A., 2007. The microcircuitry of primate subthalamic nucleus. *Park. Relat.*  
951 *Disord.* [https://doi.org/10.1016/S1353-8020\(08\)70018-X](https://doi.org/10.1016/S1353-8020(08)70018-X)
- 952 Parker, G.D., Marshall, D., Rosin, P.L., Drage, N., Richmond, S., Jones, D.K., 2013. A pitfall in the  
953 reconstruction of fibre ODFs using spherical deconvolution of diffusion MRI data.  
954 *Neuroimage* 65, 433–448. <https://doi.org/10.1016/j.neuroimage.2012.10.022>
- 955 Patenaude, B., Smith, S.M., Kennedy, D.N., Jenkinson, M., 2011. A Bayesian model of shape and

- 956 appearance for subcortical brain segmentation. *Neuroimage* 56, 907–922.
- 957 <https://doi.org/10.1016/j.neuroimage.2011.02.046>
- 958 Patriat, R., Cooper, S.E., Duchin, Y., Niederer, J., Lenglet, C., Aman, J., Park, M.C., Vitek, J.L.,  
959 Harel, N., 2018. Individualized tractography-based parcellation of the globus pallidus pars  
960 interna using 7T MRI in movement disorder patients prior to DBS surgery. *Neuroimage*.  
961 <https://doi.org/10.1016/j.neuroimage.2018.05.048>
- 962 Patriat, R., Niederer, J., Kaplan, J., Amundsen Huffmaster, S., Petrucci, M., Eberly, L., Harel, N.,  
963 MacKinnon, C., 2020. Morphological changes in the subthalamic nucleus of people with mild-  
964 to-moderate Parkinson’s disease: a 7T MRI study. *Sci. Rep.* [https://doi.org/10.1038/s41598-](https://doi.org/10.1038/s41598-020-65752-0)  
965 [020-65752-0](https://doi.org/10.1038/s41598-020-65752-0)
- 966 Pauli, W.M., Nili, A.N., Tyszka, J.M., 2018. A high-resolution probabilistic in vivo atlas of human  
967 subcortical brain nuclei. *Sci. Data* 5, 180063. <https://doi.org/10.1038/sdata.2018.63>
- 968 Petersen, M. V., Lund, T.E., Sunde, N., Frandsen, J., Rosendal, F., Juul, N., Østergaard, K., 2017.  
969 Probabilistic versus deterministic tractography for delineation of the cortico-subthalamic  
970 hyperdirect pathway in patients with Parkinson disease selected for deep brain stimulation. *J.*  
971 *Neurosurg.* <https://doi.org/10.3171/2016.4.JNS1624>
- 972 Plantinga, B.R., Temel, Y., Duchin, Y., Uludağ, K., Patriat, R., Roebroek, A., Kuijf, M.,  
973 Jahanshahi, A., ter Haar Romenij, B., Vitek, J., Harel, N., 2018. Individualized parcellation of  
974 the subthalamic nucleus in patients with Parkinson’s disease with 7T MRI. *Neuroimage*.  
975 <https://doi.org/10.1016/j.neuroimage.2016.09.023>
- 976 Polosan, M., Droux, F., Kibleur, A., Chabardes, S., Bougerol, T., David, O., Krack, P., Voon, V.,  
977 2019. Affective modulation of the associative-limbic subthalamic nucleus: deep brain  
978 stimulation in obsessive–compulsive disorder. *Transl. Psychiatry*.  
979 <https://doi.org/10.1038/s41398-019-0404-y>
- 980 Reisert, M., Mader, I., Anastasopoulos, C., Weigel, M., Schnell, S., Kiselev, V., 2011. Global fiber  
981 reconstruction becomes practical. *Neuroimage*.  
982 <https://doi.org/10.1016/j.neuroimage.2010.09.016>
- 983 Rizzo, G., Milardi, D., Bertino, S., Basile, G.A., Di Mauro, D., Calamuneri, A., Chillemi, G.,  
984 Silvestri, G., Anastasi, G., Bramanti, A., Cacciola, A., 2018. The Limbic and Sensorimotor  
985 Pathways of the Human Amygdala: A Structural Connectivity Study. *Neuroscience* 385, 166–  
986 180. <https://doi.org/10.1016/j.neuroscience.2018.05.051>
- 987 Rodriguez-Oroz, M.C., Obeso, J.A., Lang, A.E., Houeto, J.L., Pollak, P., Rehncrona, S.,  
988 Kulisevsky, J., Albanese, A., Volkmann, J., Hariz, M.I., Quinn, N.P., Speelman, J.D., Guridi,  
989 J., Zamarbide, I., Gironell, A., Molet, J., Pascual-Sedano, B., Pidoux, B., Bonnet, A.M., Agid,

- 990 Y., Xie, J., Benabid, A.L., Lozano, A.M., Saint-Cyr, J., Romito, L., Contarino, M.F., Scerrati,  
991 M., Fraix, V., Van Blercom, N., 2005. Bilateral deep brain stimulation in Parkinson's disease:  
992 A multicentre study with 4 years follow-up. *Brain*. <https://doi.org/10.1093/brain/awh571>
- 993 Ségonne, F., Dale, A.M., Busa, E., Glessner, M., Salat, D., Hahn, H.K., Fischl, B., 2004. A hybrid  
994 approach to the skull stripping problem in MRI. *Neuroimage*.  
995 <https://doi.org/10.1016/j.neuroimage.2004.03.032>
- 996 Shink, E., Bevan, M.D., Bolam, J.P., Smith, Y., 1996. The subthalamic nucleus and the external  
997 pallidum: Two tightly interconnected structures that control the output of the basal ganglia in  
998 the monkey. *Neuroscience*. [https://doi.org/10.1016/0306-4522\(96\)00022-X](https://doi.org/10.1016/0306-4522(96)00022-X)
- 999 Smith, S.M., 2002. Fast robust automated brain extraction - Smith - 2002 - Human Brain Mapping -  
1000 Wiley Online Library. *Hum. Brain Mapp.*
- 1001 Smith, S.M., Jenkinson, M., Woolrich, M.W., Beckmann, C.F., Behrens, T.E.J., Johansen-Berg, H.,  
1002 Bannister, P.R., De Luca, M., Drobnjak, I., Flitney, D.E., Niazy, R.K., Saunders, J., Vickers,  
1003 J., Zhang, Y., De Stefano, N., Brady, J.M., Matthews, P.M., 2004. Advances in functional and  
1004 structural MR image analysis and implementation as FSL, in: *NeuroImage*.  
1005 <https://doi.org/10.1016/j.neuroimage.2004.07.051>
- 1006 Smith, Y., Hazrati, L. -N, Parent, A., 1990. Efferent projections of the subthalamic nucleus in the  
1007 squirrel monkey as studied by the PHA-L anterograde tracing method. *J. Comp. Neurol.*  
1008 <https://doi.org/10.1002/cne.902940213>
- 1009 Smith, Y., Parent, A., 1988. Neurons of the subthalamic nucleus in primates display glutamate but  
1010 not GABA immunoreactivity. *Brain Res.* [https://doi.org/10.1016/0006-8993\(88\)90177-1](https://doi.org/10.1016/0006-8993(88)90177-1)
- 1011 Smith, Y., Wichmann, T., DeLong, M.R., 1994. Synaptic innervation of neurons in the internal  
1012 pallidal segment by the subthalamic nucleus and the external pallidum in monkeys. *J. Comp.*  
1013 *Neurol.* <https://doi.org/10.1002/cne.903430209>
- 1014 Sotiropoulos, S.N., Jbabdi, S., Xu, J., Andersson, J.L., Moeller, S., Auerbach, E.J., Glasser, M.F.,  
1015 Hernandez, M., Sapiro, G., Jenkinson, M., Feinberg, D.A., Yacoub, E., Lenglet, C., Van Essen,  
1016 D.C., Ugurbil, K., Behrens, T.E.J., 2013. Advances in diffusion MRI acquisition and  
1017 processing in the Human Connectome Project. *Neuroimage*.  
1018 <https://doi.org/10.1016/j.neuroimage.2013.05.057>
- 1019 Temel, Y., Blokland, A., Steinbusch, H.W.M., Visser-Vandewalle, V., 2005. The functional role of  
1020 the subthalamic nucleus in cognitive and limbic circuits. *Prog. Neurobiol.*  
1021 <https://doi.org/10.1016/j.pneurobio.2005.09.005>
- 1022 Theisen, F., Leda, R., Pozorski, V., Oh, J.M., Adluru, N., Wong, R., Okonkwo, O., Dean, D.C.,  
1023 Bendlin, B.B., Johnson, S.C., Alexander, A.L., Gallagher, C.L., 2017. Evaluation of

- 1024 striatonigral connectivity using probabilistic tractography in Parkinson's disease. *NeuroImage*  
1025 *Clin.* <https://doi.org/10.1016/j.nicl.2017.09.009>
- 1026 Tournier, J.-D., Calamante, F., Connelly, A., 2012. MRtrix: Diffusion tractography in crossing fiber  
1027 regions. *Int. J. Imaging Syst. Technol.* 22, 53–66. <https://doi.org/10.1002/ima.22005>
- 1028 Tournier, J.-D., Calamante, F., Connelly, A., 2010. Improved probabilistic streamlines tractography  
1029 by 2nd order integration over fibre orientation distributions. *Proc. Int. Soc. Magn. Reson. Med.*
- 1030 Tournier, J.D., Calamante, F., Connelly, A., 2007. Robust determination of the fibre orientation  
1031 distribution in diffusion MRI: Non-negativity constrained super-resolved spherical  
1032 deconvolution. *Neuroimage*. <https://doi.org/10.1016/j.neuroimage.2007.02.016>
- 1033 Tournier, J.D., Yeh, C.H., Calamante, F., Cho, K.H., Connelly, A., Lin, C.P., 2008. Resolving  
1034 crossing fibres using constrained spherical deconvolution: Validation using diffusion-weighted  
1035 imaging phantom data. *Neuroimage* 42, 617–625.  
1036 <https://doi.org/10.1016/j.neuroimage.2008.05.002>
- 1037 Traynor, C., Heckemann, R.A., Hammers, A., O'Muircheartaigh, J., Crum, W.R., Barker, G.J.,  
1038 Richardson, M.P., 2010. Reproducibility of thalamic segmentation based on probabilistic  
1039 tractography. *Neuroimage* 52, 69–85. <https://doi.org/10.1016/j.neuroimage.2010.04.024>
- 1040 Tremblay, L., Worbe, Y., Thobois, S., Sgambato-Faure, V., Féger, J., 2015. Selective dysfunction  
1041 of basal ganglia subterritories: From movement to behavioral disorders. *Mov. Disord.*  
1042 <https://doi.org/10.1002/mds.26199>
- 1043 Tyagi, H., Apergis-Schoute, A.M., Akram, H., Foltynie, T., Limousin, P., Drummond, L.M.,  
1044 Fineberg, N.A., Matthews, K., Jahanshahi, M., Robbins, T.W., Sahakian, B.J., Zrinzo, L.,  
1045 Hariz, M., Joyce, E.M., 2019. A Randomized Trial Directly Comparing Ventral Capsule and  
1046 Anteromedial Subthalamic Nucleus Stimulation in Obsessive-Compulsive Disorder: Clinical  
1047 and Imaging Evidence for Dissociable Effects. *Biol. Psychiatry*.  
1048 <https://doi.org/10.1016/j.biopsych.2019.01.017>
- 1049 Tziortzi, A.C., Haber, S.N., Searle, G.E., Tsoumpas, C., Long, C.J., Shotbolt, P., Douaud, G.,  
1050 Jbabdi, S., Behrens, T.E.J., Rabiner, E.A., Jenkinson, M., Gunn, R.N., 2014. Connectivity-  
1051 based functional analysis of dopamine release in the striatum using diffusion-weighted MRI  
1052 and positron emission tomography. *Cereb. Cortex*. <https://doi.org/10.1093/cercor/bhs397>
- 1053 Uğurbil, K., Xu, J., Auerbach, E.J., Moeller, S., Vu, A.T., Duarte-Carvajalino, J.M., Lenglet, C.,  
1054 Wu, X., Schmitter, S., Van de Moortele, P.F., Strupp, J., Sapiro, G., De Martino, F., Wang, D.,  
1055 Harel, N., Garwood, M., Chen, L., Feinberg, D.A., Smith, S.M., Miller, K.L., Sotiropoulos,  
1056 S.N., Jbabdi, S., Andersson, J.L.R., Behrens, T.E.J., Glasser, M.F., Van Essen, D.C., Yacoub,  
1057 E., 2013. Pushing spatial and temporal resolution for functional and diffusion MRI in the

- 1058 Human Connectome Project. *Neuroimage* 80, 80–104.  
1059 <https://doi.org/10.1016/j.neuroimage.2013.05.012>
- 1060 Van Essen, D.C., Smith, S.M., Barch, D.M., Behrens, T.E.J., Yacoub, E., Ugurbil, K., 2013. The  
1061 WU-Minn Human Connectome Project: An overview. *Neuroimage* 80, 62–79.  
1062 <https://doi.org/10.1016/j.neuroimage.2013.05.041>
- 1063 Van Essen, D.C., Ugurbil, K., Auerbach, E., Barch, D., Behrens, T.E.J., Bucholz, R., Chang, A.,  
1064 Chen, L., Corbetta, M., Curtiss, S.W., Della Penna, S., Feinberg, D., Glasser, M.F., Harel, N.,  
1065 Heath, A.C., Larson-Prior, L., Marcus, D., Michalareas, G., Moeller, S., Oostenveld, R.,  
1066 Petersen, S.E., Prior, F., Schlaggar, B.L., Smith, S.M., Snyder, A.Z., Xu, J., Yacoub, E., 2012.  
1067 The Human Connectome Project: A data acquisition perspective. *Neuroimage* 62, 2222–2231.  
1068 <https://doi.org/10.1016/j.neuroimage.2012.02.018>
- 1069 Veraart, J., Sijbers, J., Sunaert, S., Leemans, A., Jeurissen, B., 2013. Weighted linear least squares  
1070 estimation of diffusion MRI parameters: Strengths, limitations, and pitfalls. *Neuroimage*.  
1071 <https://doi.org/10.1016/j.neuroimage.2013.05.028>
- 1072 Weaver, F.M., Follett, K., Stern, M., Hur, K., Harris, C., Marks, W.J., Rothlind, J., Sagher, O.,  
1073 Reda, D., Moy, C.S., Pahwa, R., Burchiel, K., Hogarth, P., Lai, E.C., Duda, J.E., Holloway,  
1074 K., Samii, A., Horn, S., Bronstein, J., Stoner, G., Heemskerk, J., Huang, G.D., 2009. Bilateral  
1075 deep brain stimulation vs best medical therapy for patients with advanced parkinson disease: A  
1076 randomized controlled trial. *JAMA - J. Am. Med. Assoc.*  
1077 <https://doi.org/10.1001/jama.2008.929>
- 1078 Welter, M.L., Burbaud, P., Fernandez-Vidal, S., Bardinet, E., Coste, J., Piallat, B., Borg, M.,  
1079 Besnard, S., Sauleau, P., Devaux, B., Pidoux, B., Chaynes, P., Tézenas Du Montcel, S.,  
1080 Bastian, A., Langbour, N., Teillant, A., Haynes, W., Yelnik, J., Karachi, C., Mallet, L., 2011.  
1081 Basal ganglia dysfunction in OCD: Subthalamic neuronal activity correlates with symptoms  
1082 severity and predicts high-frequency stimulation efficacy. *Transl. Psychiatry*.  
1083 <https://doi.org/10.1038/tp.2011.5>  
1084
